# Supplementary material for: A multiethnic genome-wide association study of primary open-angle glaucoma identifies novel risk loci
Source: PubMed Central journal article supplement (PMC5995837; doi:10.1038/s41467-018-04555-4), 2018-06-11
Supplement: 41467_2018_4555_MOESM2_ESM.pdf [file 41467_2018_4555_MOESM2_ESM.pdf]

**Supplementary Information for “A multiethnic genome-wide association study of primary open-angle glaucoma identifies novel risk loci”**

Choquet et al.

**Supplementary Figure 1.** QQ plots and genomic inflation factors ( $\lambda$ ) observed in **a.** the discovery GERA multi-ethnic meta-analysis of POAG, and each race/ethnicity group: **b.** non-Hispanic white, **c.** Hispanic/Latino, **d.** East Asian, and **e.** African-American

**a.**

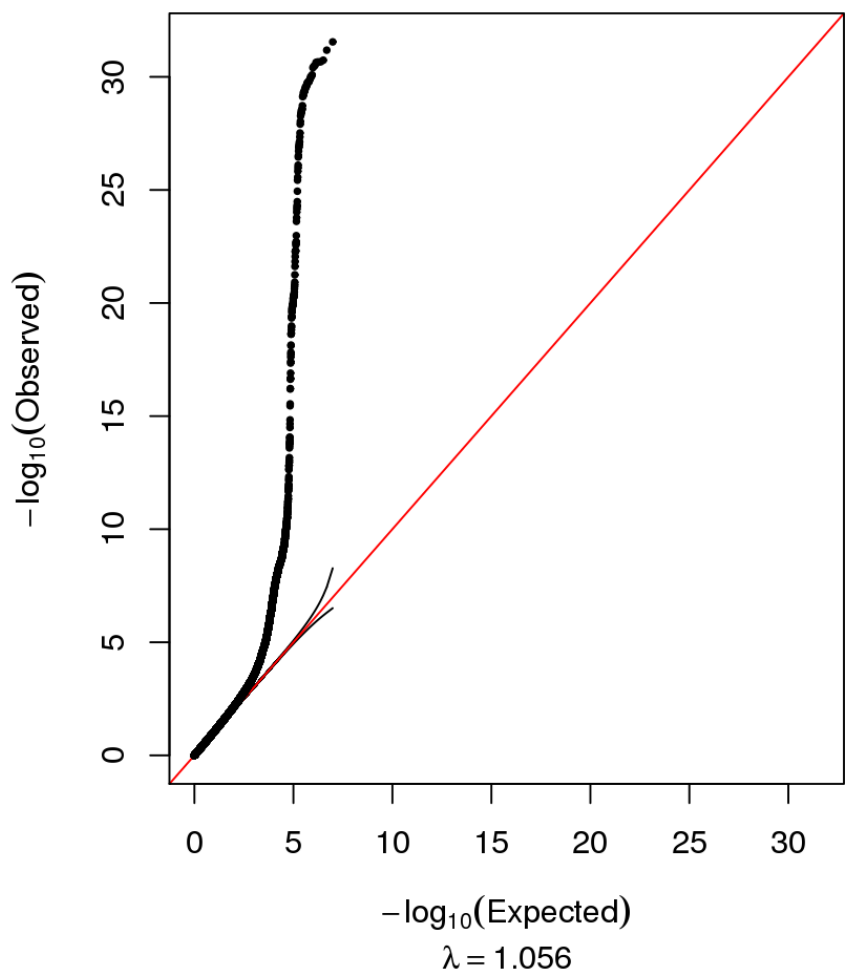

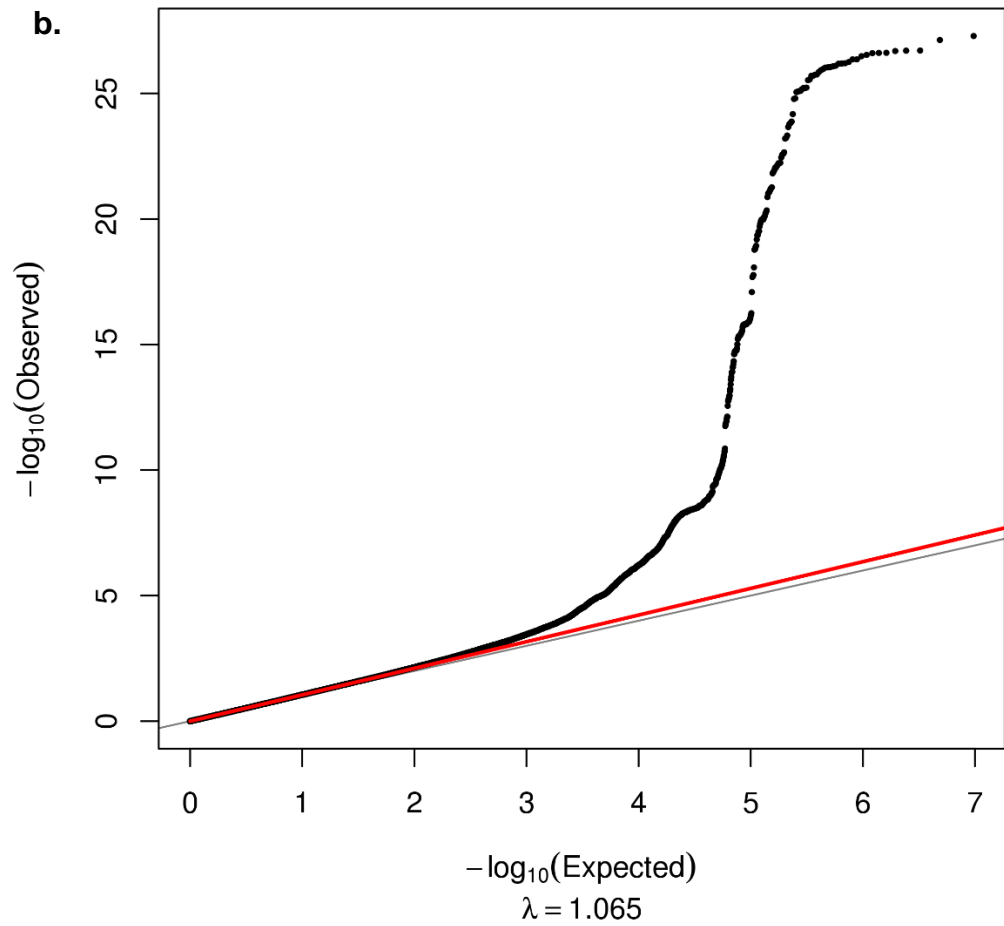

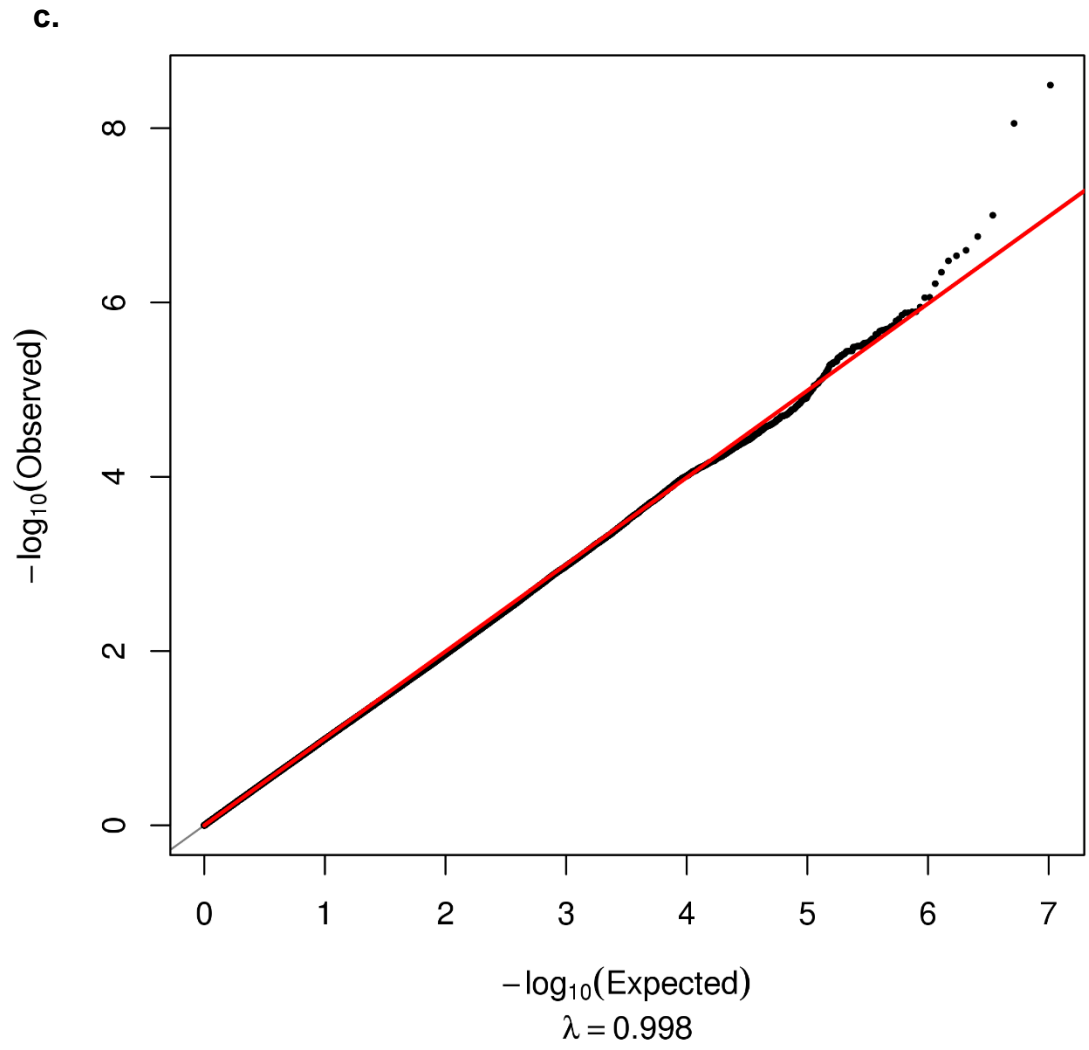

d.

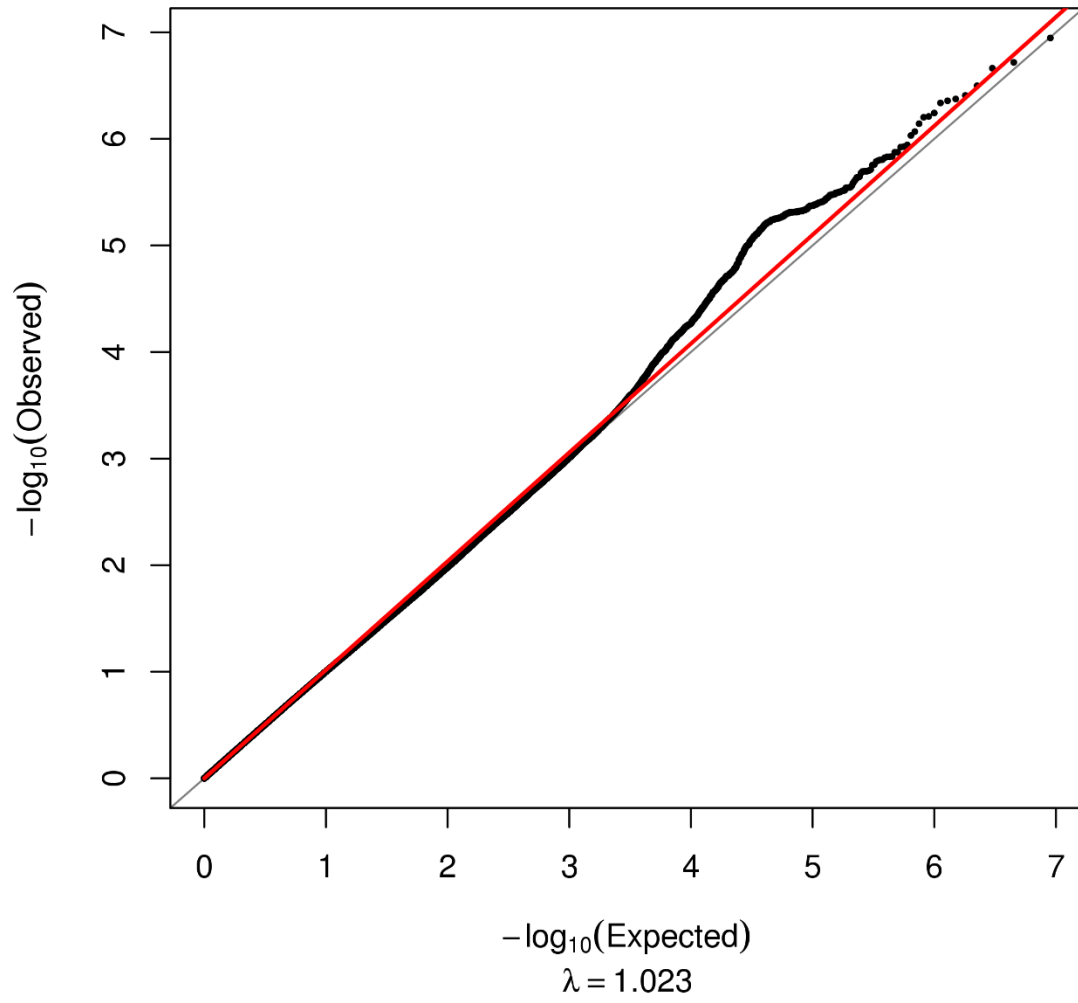

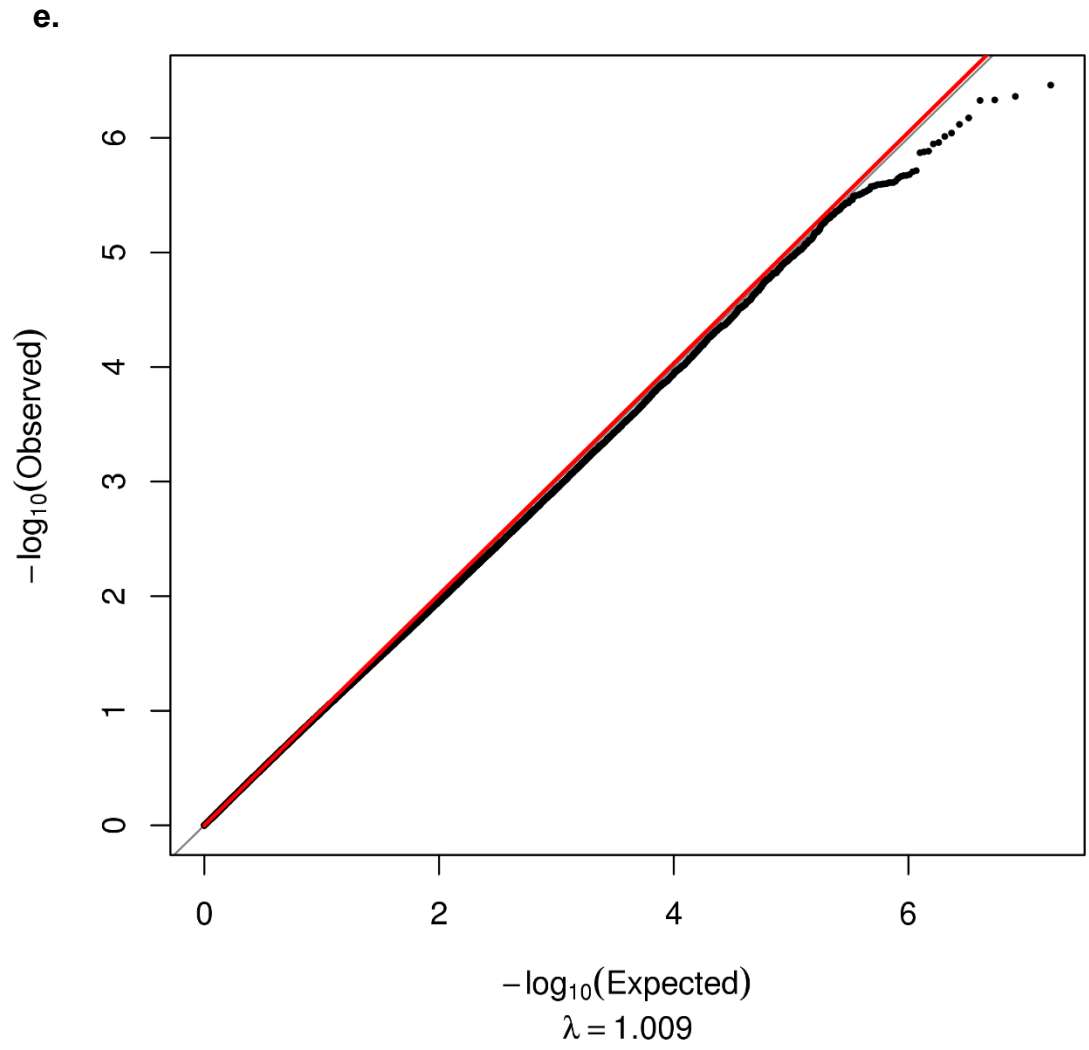

**Supplementary Figure 2.** Chicago plot of the GERA GWAS meta-analysis of POAG (upper panel) and UKB GWAS meta-analysis of glaucoma (lower panel)

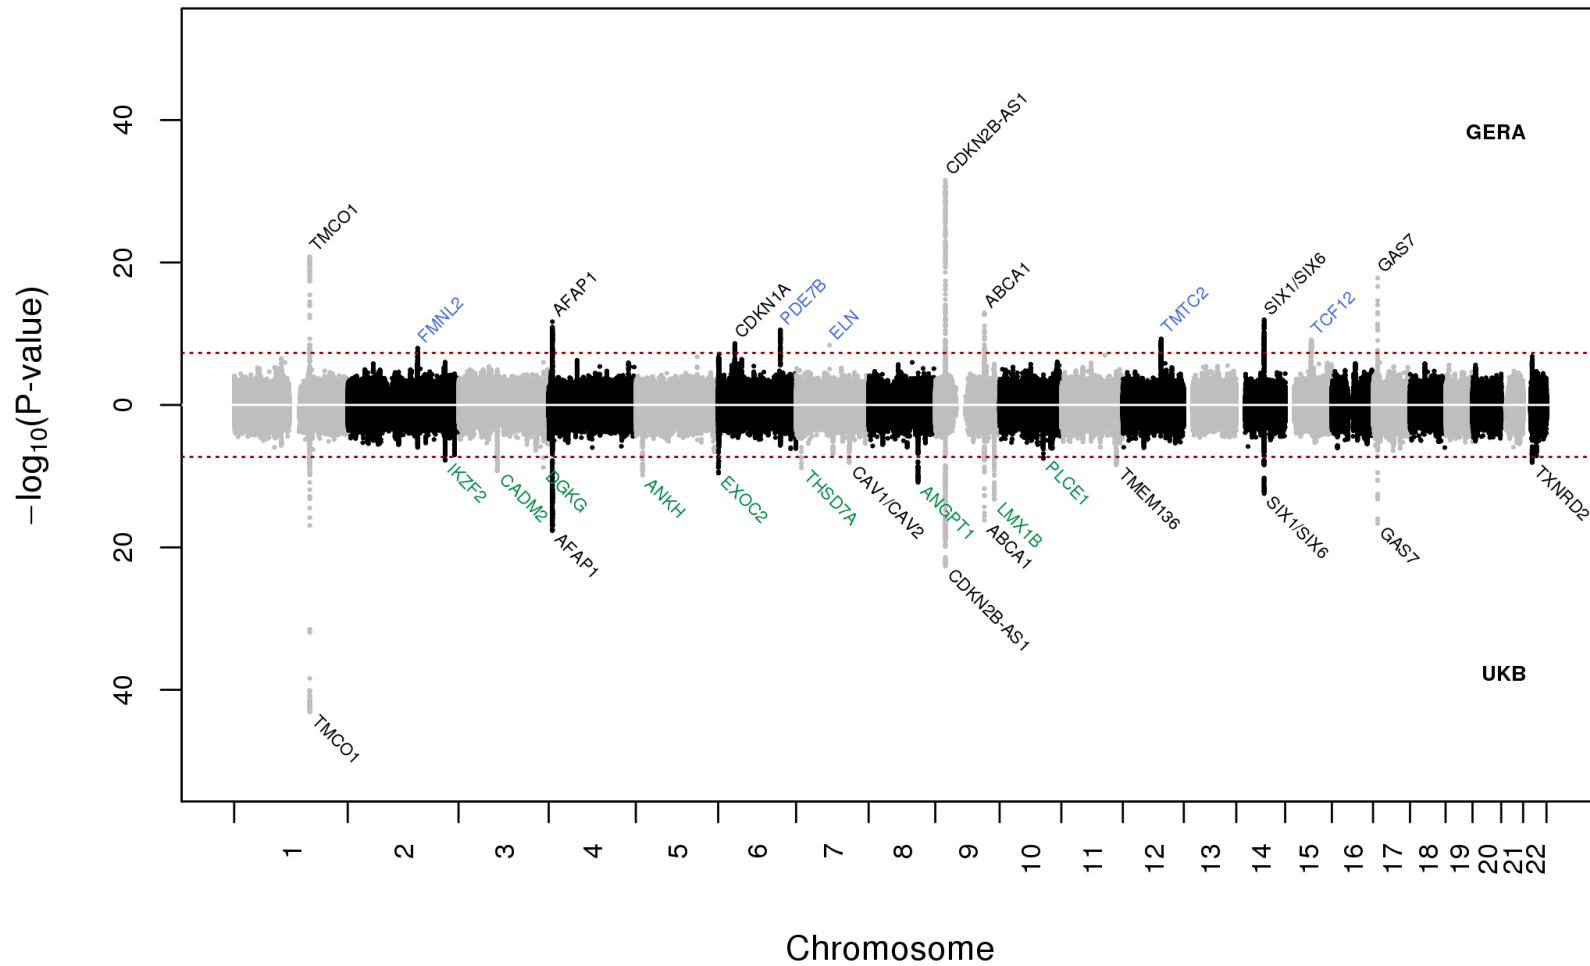

Association results ( $-\log_{10} P$ -values) are plotted for each chromosome. The locus/gene names are indicated in black for previously reported loci, in blue for each novel locus identified in GERA and associated with POAG, and in green for each novel locus identified in UKB and associated with glaucoma.





**b.**

Plotted SNPs

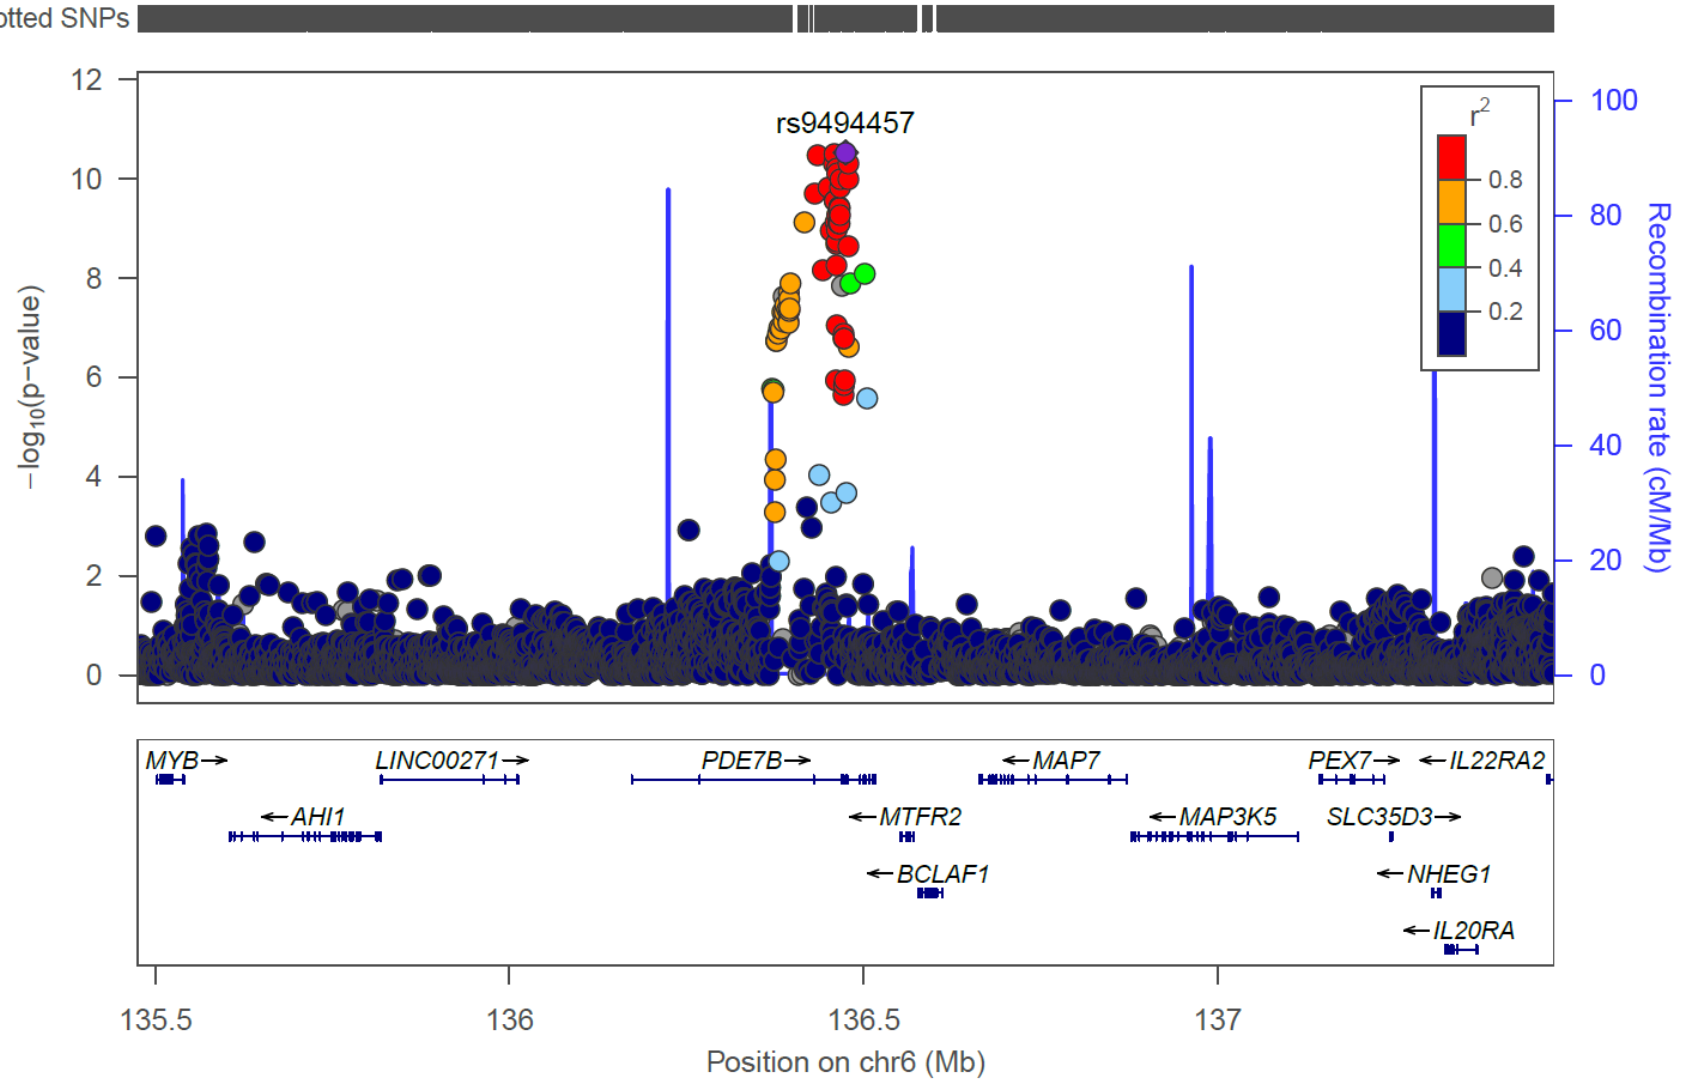

**c.**

Plotted SNPs

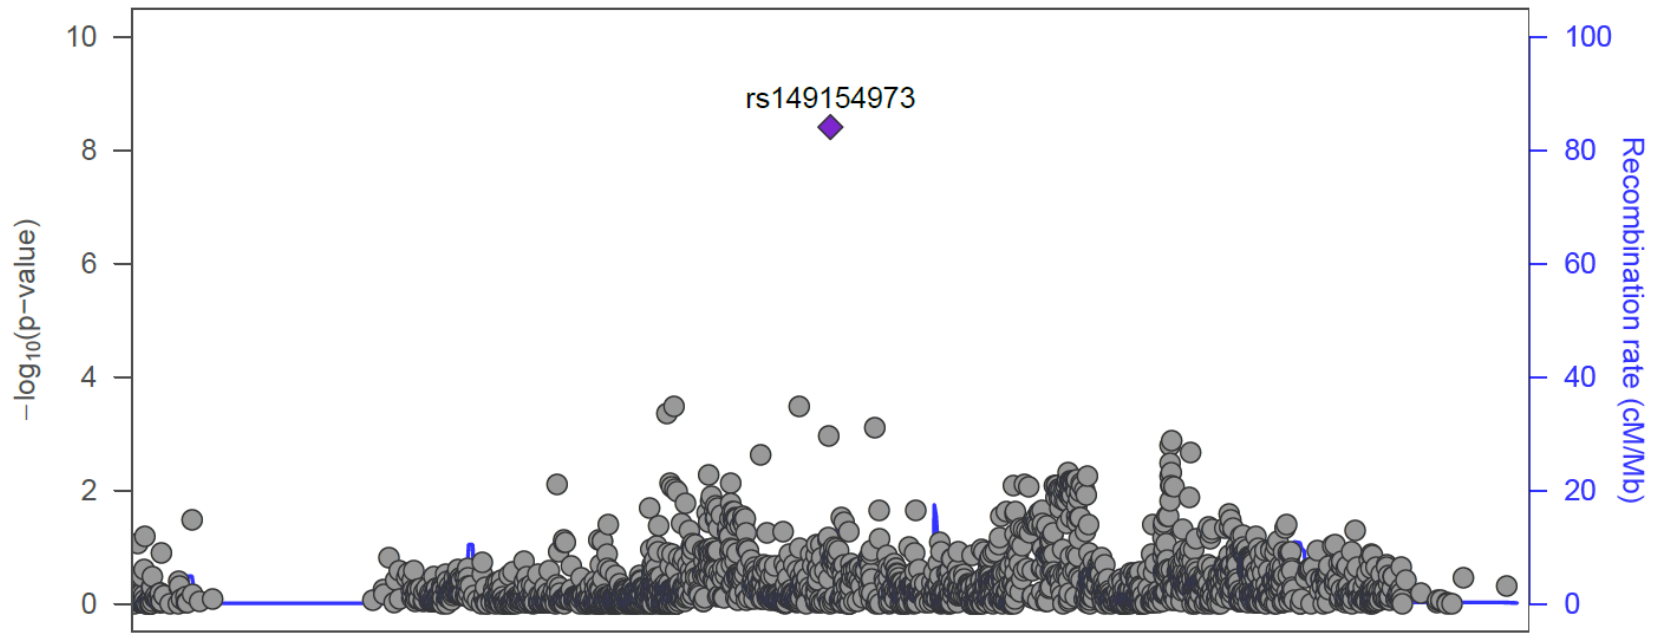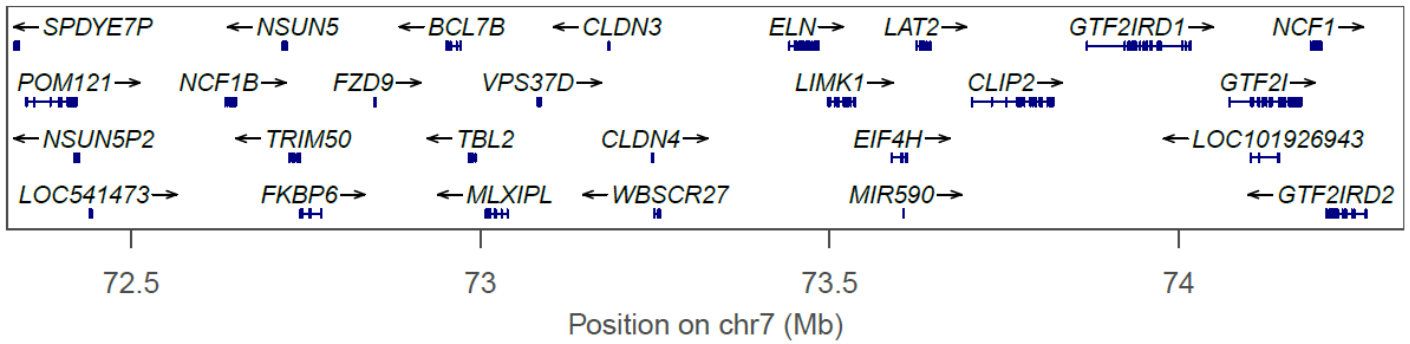

18 genes omitted

d.

Plotted SNPs

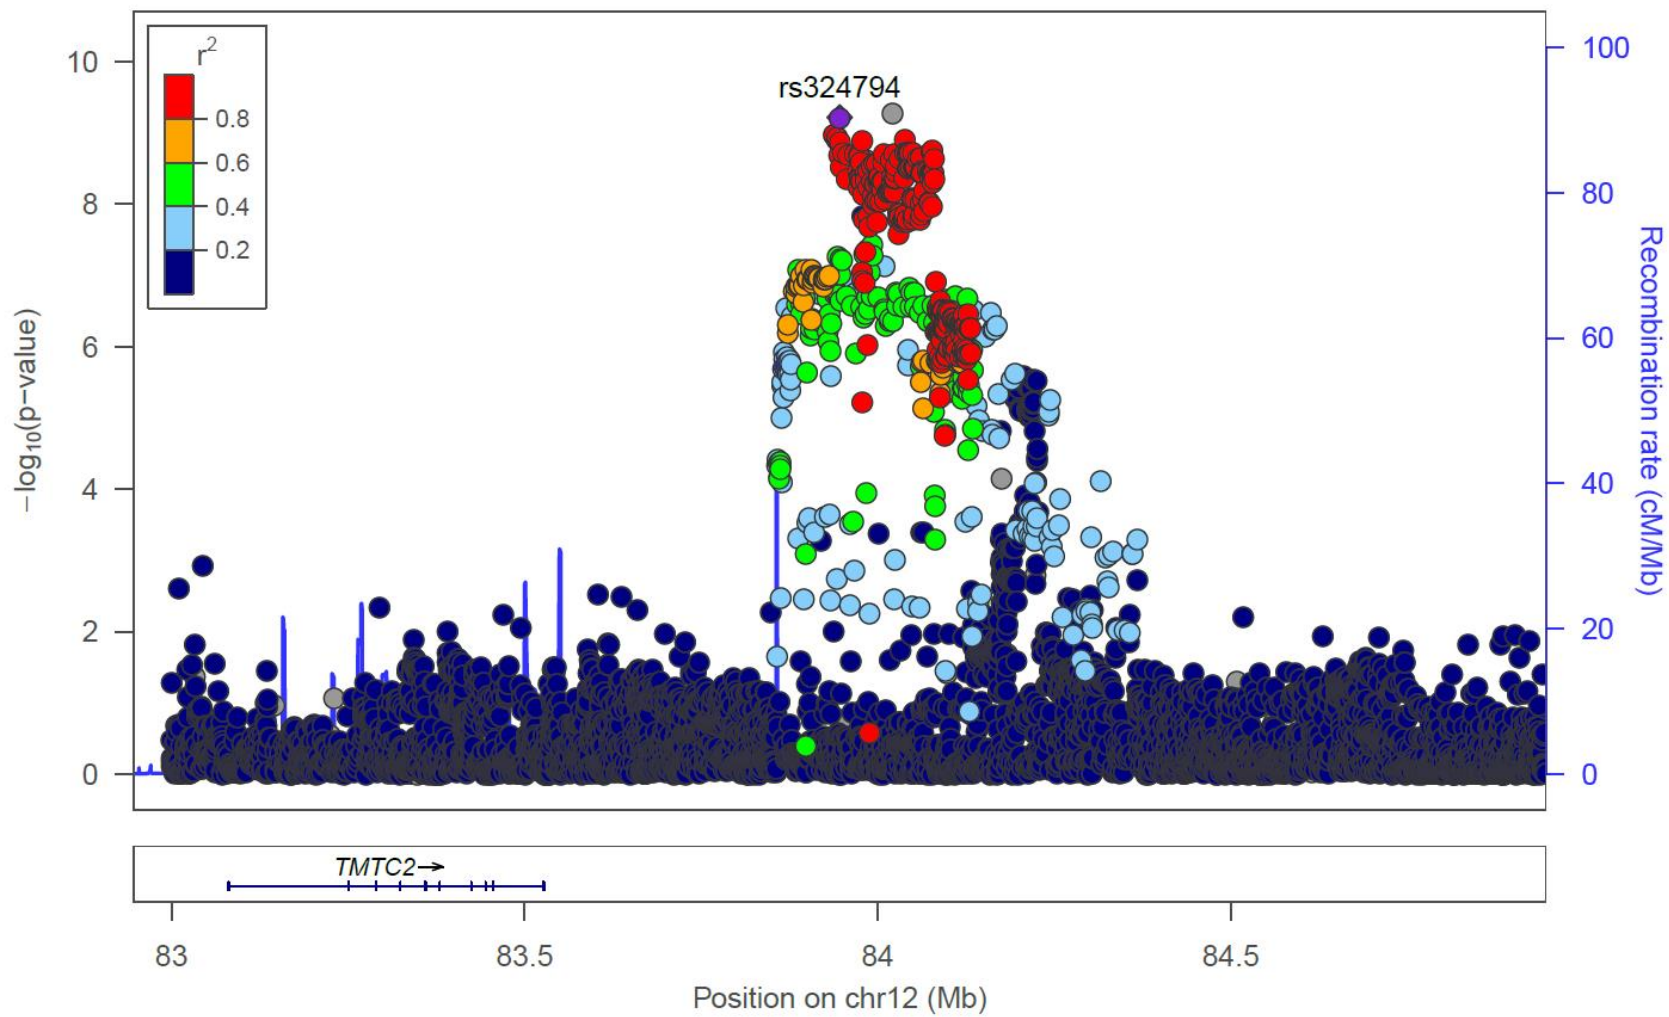

e.

Plotted SNPs

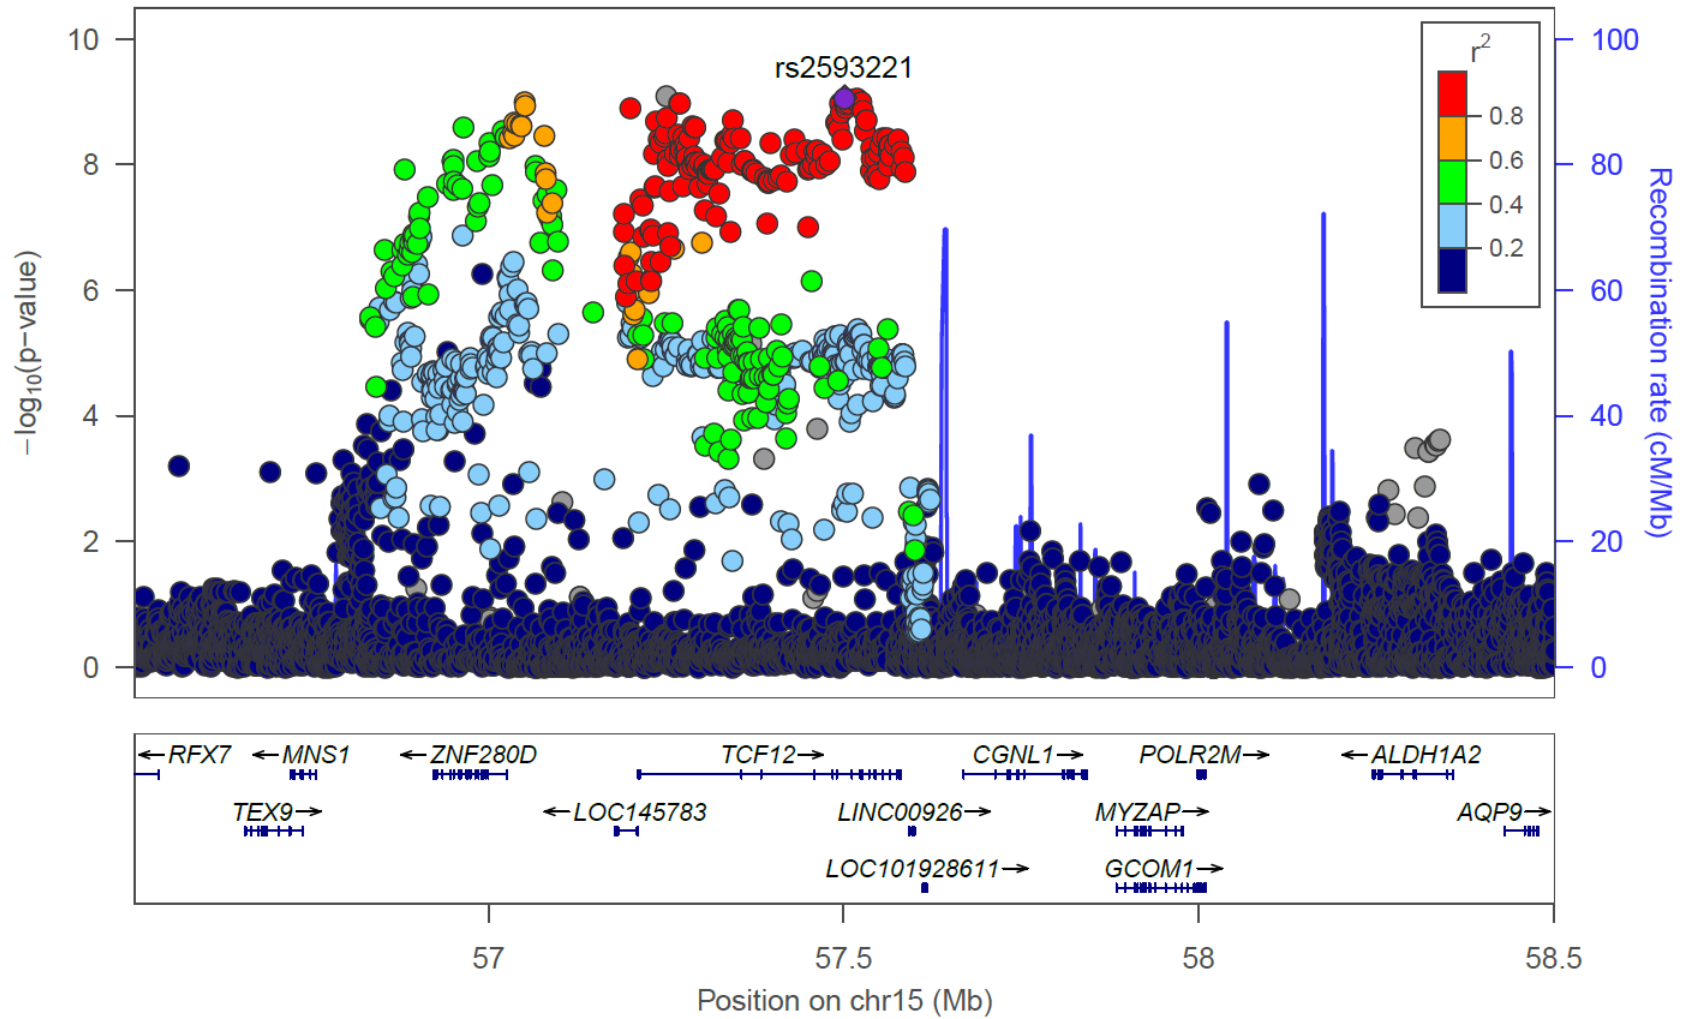

**Supplementary Figure 4.** Expression of glaucoma candidate genes in retinal ganglion cells (RGCs) in a mouse model of inherited glaucoma

**a.** Individual gene expression plots showing  $\log_2$  fold change of transcripts in DBA/2J2 (D2) RGCs of genes identified in the credible set analysis. D2 and D2-*Gpnmb*<sup>+</sup> mice used for the gene expression studies were from the The Jackson Laboratory. Experimental mice were all 9 month old females (See GEO entry: GSE90654). Bars represent individual transcripts, grey = not differentially expressed, red = differentially expressed at a FDR (Bonferroni adjusted),  $q < 0.05$  compared to D2-*Gpnmb*<sup>+</sup> controls (as in Williams *et al.* Science 2017<sup>1</sup>). There are no differentially expressed genes in Group 1 (representing samples that are transcriptomically identical to D2-*Gpnmb*<sup>+</sup> controls and have not yet progressed to glaucoma). Replicates used for each group are as follows: D2-*Gpnmb*<sup>+</sup> Control group = 9, D2 Group 1 = 6, Group 2 = 5, Group 3 = 10, Group 4 = 4.

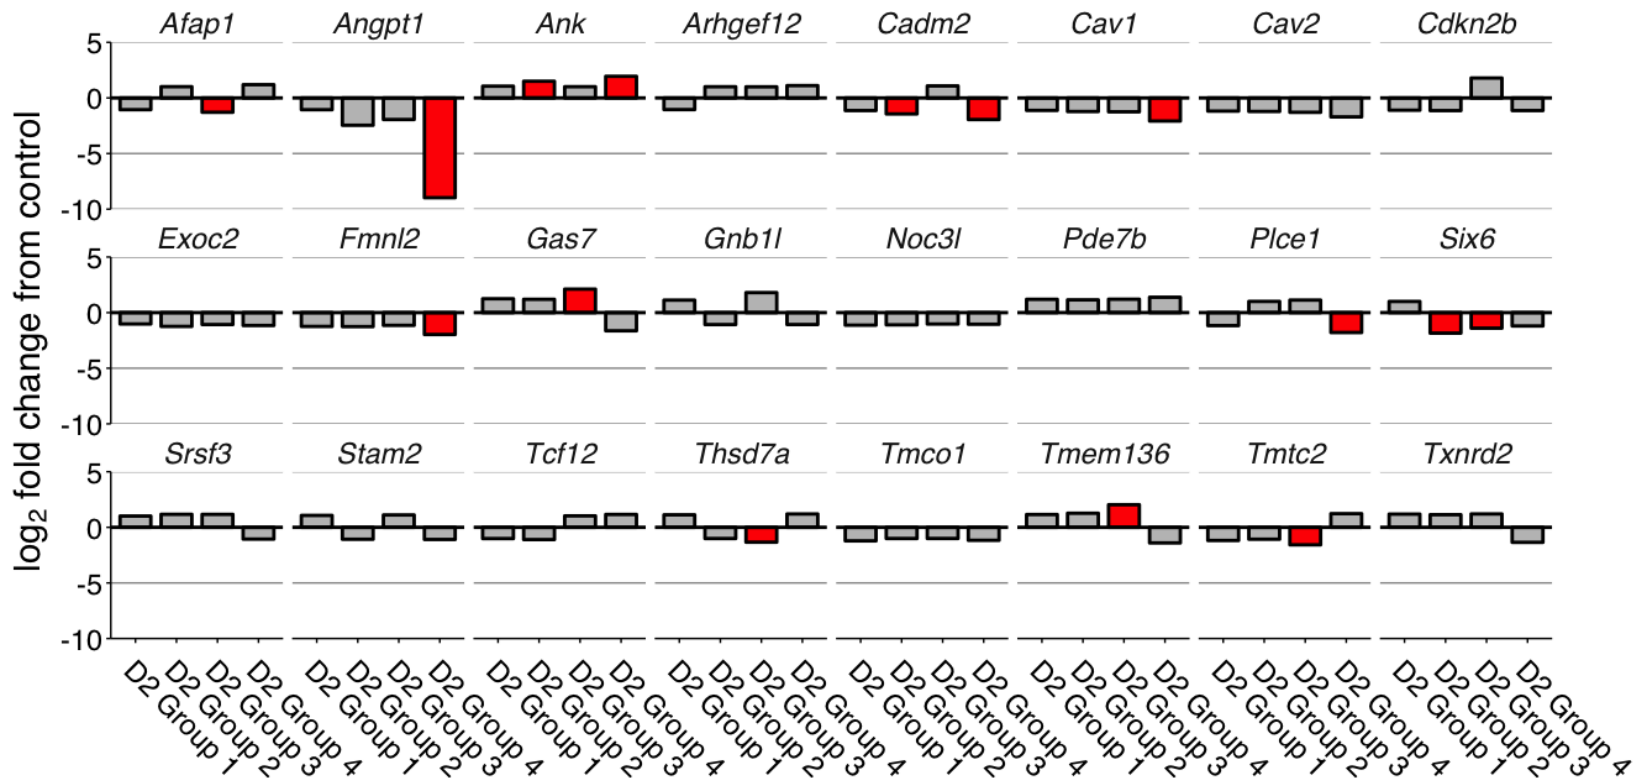

**b.** Normalized counts per million (CPM) of transcript levels of genes identified in the credible set analysis. Normalization was performed using the trimmed mean of M values (TMM) method.

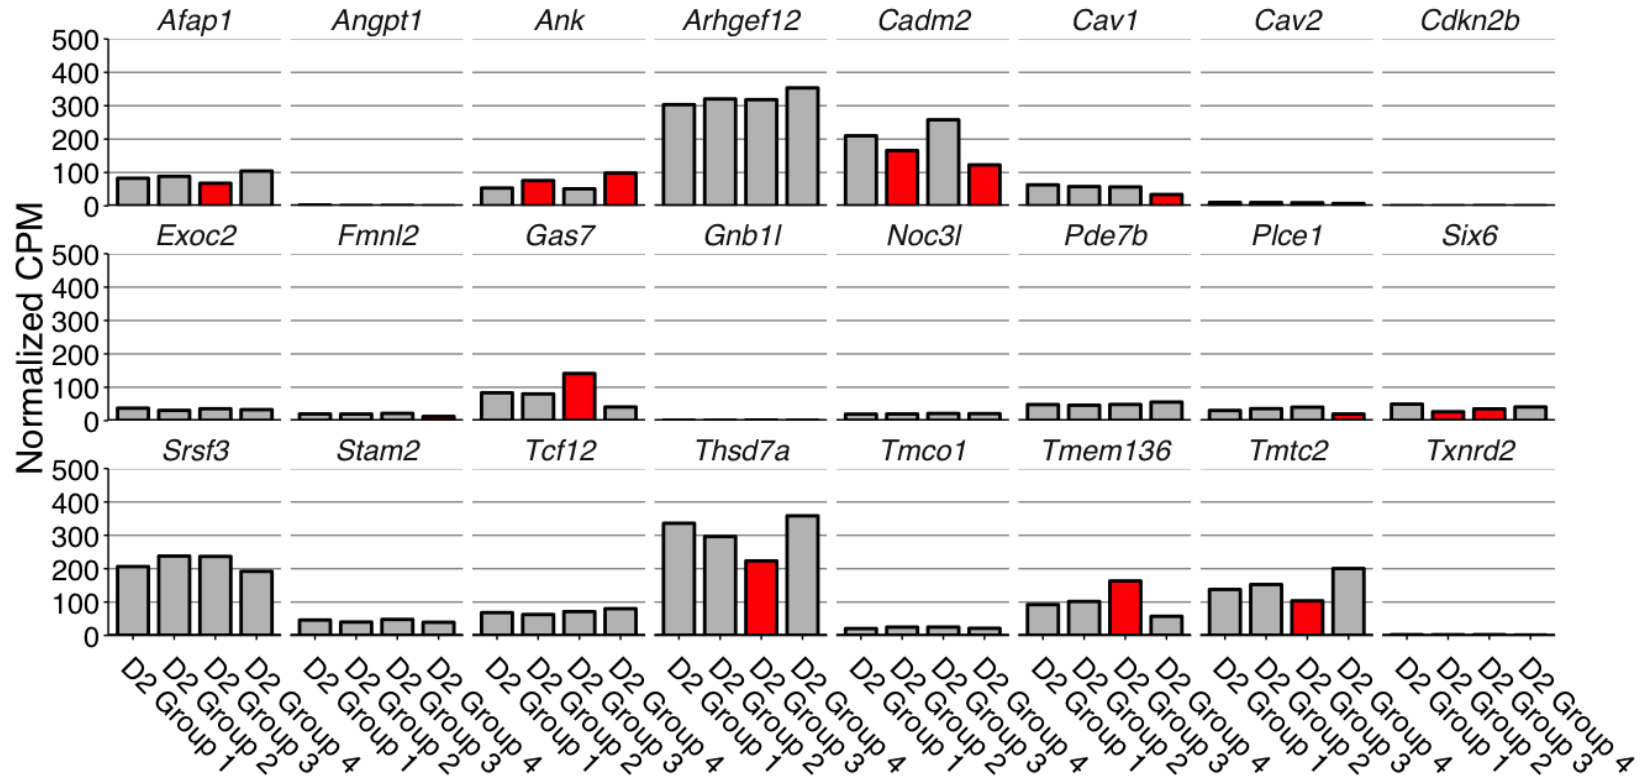

**Supplementary Figure 5. *FMNL2* knockdown induces change in human trabecular meshwork cell morphology.** *Fmnl2* was silenced in the HTM using siRNA2. The cells were then serum-starved for 24 hours to disrupt the normal actin assembly. Followed by FBS treatment for 10 minutes or 1 hour to induce formation of actin stress fibers and cell spreading. **a.** Fluorescent microscopic images of Phalloidin-FITC stained F-actin shows that the actin stress fibers are poorly organized in the serum starved control siRNA transfected cells (-FBS), and following treatment with FBS (+FBS for 10 min or 1hour) the stress fibers are prominently visible. Moreover, the control siRNA transfected HTM cells treated with FBS for 10 minutes or 1 hour are well spread. In contrast, the actin stress fibers of the HTM cells transfected with *FMNL2*-siRNA2 exhibited poorly formed actin stress fiber even after 1hour treatment with FBS. Furthermore, in general the cells appear poorly spread. **b.** Magnified images of Phalloidin-FITC stained F-actin presented in **a** are shown. White arrows indicate cells with deformed/rounded morphology, arrowheads indicate cells with modest spreading (intermediate) and asterisks indicate well-spread cells. Scale = 50  $\mu$ m.



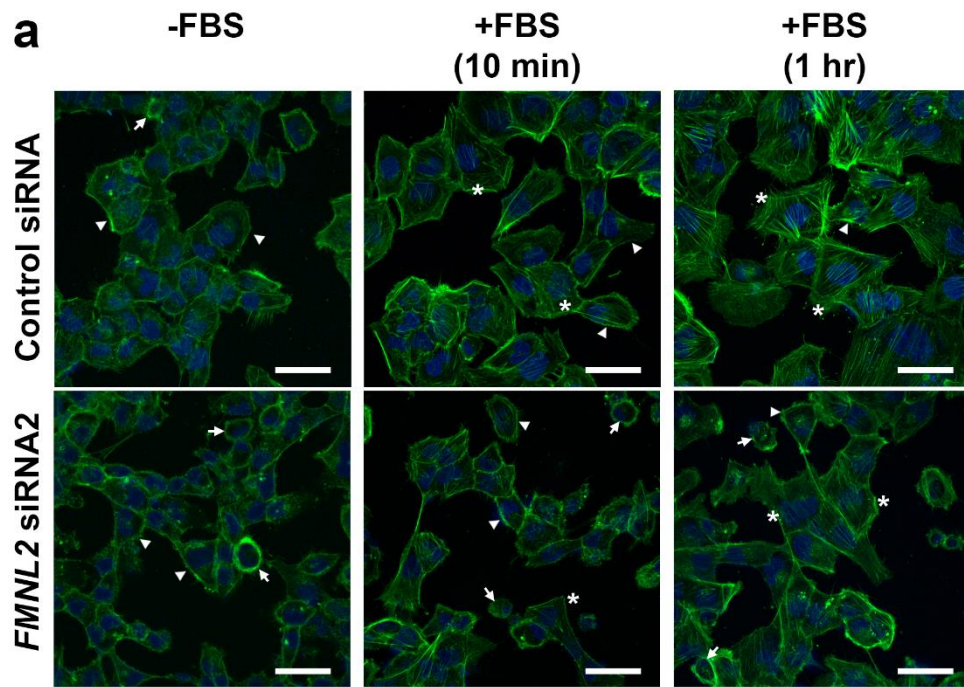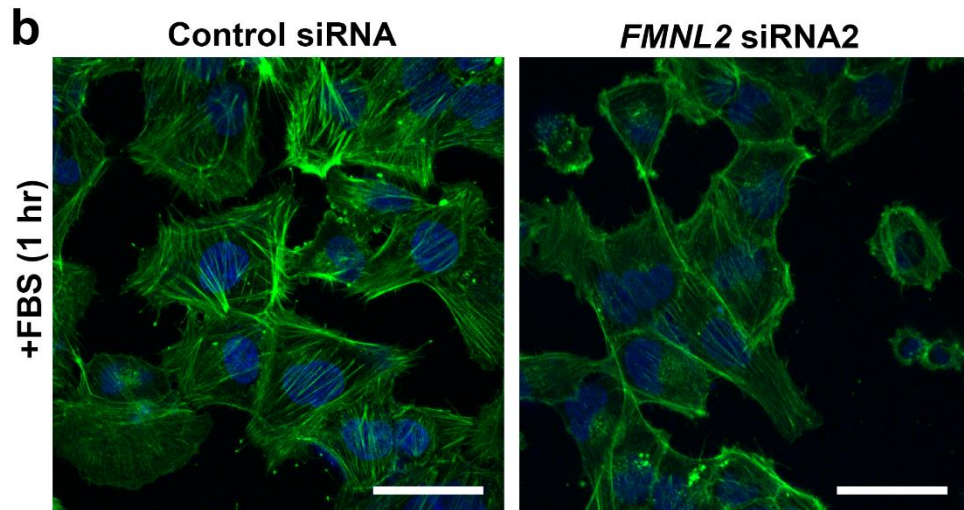



**Supplementary Table 1.** Association of each covariate (age, sex, ancestry PCs) with POAG in the GERA cohort. For the interpretation of the PCs, see Banda *et al.* Genetics 2015<sup>2</sup>. Effect size estimates ( $\beta$ ) and p-values are from the multivariate regression model.

| <b>Non-Hispanic whites</b> |         |       |                          |
|----------------------------|---------|-------|--------------------------|
|                            | $\beta$ | SE    | P-value                  |
| Age                        | 0.07    | 0.002 | $< 9.2 \times 10^{-308}$ |
| Sex                        | -0.06   | 0.03  | 0.09                     |
| PC1                        | 4.30    | 2.33  | 0.06                     |
| PC2                        | -0.42   | 2.50  | 0.87                     |
| PC3                        | 0.97    | 2.78  | 0.73                     |
| PC4                        | 3.38    | 2.91  | 0.24                     |
| PC5                        | -2.91   | 3.33  | 0.38                     |
| PC6                        | 0.04    | 2.90  | 0.99                     |
| PC7                        | -2.62   | 3.13  | 0.40                     |
| PC8                        | -0.20   | 3.13  | 0.95                     |
| PC9                        | -0.09   | 3.06  | 0.98                     |
| PC10                       | 1.16    | 3.07  | 0.71                     |
| ASHK                       | 0.08    | 0.11  | 0.50                     |
| <b>Hispanic/Latinos</b>    |         |       |                          |
|                            | $\beta$ | SE    | P-value                  |
| Age                        | 0.06    | 0.005 | $1.7 \times 10^{-34}$    |
| Sex                        | -0.07   | 0.11  | 0.54                     |
| PC1                        | -34.78  | 6.43  | $6.3 \times 10^{-8}$     |
| PC2                        | 3.17    | 6.21  | 0.61                     |
| PC3                        | -4.91   | 5.76  | 0.39                     |
| PC4                        | -2.81   | 6.01  | 0.64                     |
| PC5                        | 5.39    | 4.41  | 0.22                     |
| PC6                        | 7.72    | 4.72  | 0.10                     |
| <b>East Asians</b>         |         |       |                          |
|                            | $\beta$ | SE    | P-value                  |
| Age                        | 0.06    | 0.005 | $8.8 \times 10^{-38}$    |
| Sex                        | -0.40   | 0.11  | 0.00015                  |
| PC1                        | 8.53    | 5.86  | 0.15                     |
| PC2                        | 25.13   | 4.67  | $7.3 \times 10^{-8}$     |
| PC3                        | 6.67    | 4.91  | 0.17                     |
| PC4                        | 1.74    | 5.36  | 0.75                     |
| PC5                        | 2.44    | 4.61  | 0.60                     |

|                          |                           |           |                        |
|--------------------------|---------------------------|-----------|------------------------|
| PC6                      | 9.32                      | 6.75      | 0.17                   |
| <b>African Americans</b> |                           |           |                        |
|                          | <b><math>\beta</math></b> | <b>SE</b> | <b>P-value</b>         |
| Age                      | 0.07                      | 0.007     | $6.78 \times 10^{-28}$ |
| Sex                      | -0.26                     | 0.13      | 0.05                   |
| PC1                      | 10.37                     | 3.98      | 0.01                   |
| PC2                      | 1.24                      | 3.73      | 0.74                   |
| PC3                      | 2.92                      | 3.67      | 0.43                   |
| PC4                      | -0.15                     | 3.67      | 0.97                   |
| PC5                      | 1.38                      | 3.74      | 0.71                   |
| PC6                      | 0.82                      | 3.75      | 0.83                   |

Abbreviations: PC, principal component; ASHK, Ashkenazi ancestry proportion;  $\beta$ , beta; SE, standard error

**Supplementary Table 2.** Lead POAG SNPs ( $P < 5 \times 10^{-8}$ ) by race/ethnicity group in the GERA discovery cohort

| SNP         | Locus              | Alleles | NHW  |                     |                               | H/L  |                     |                        | EAS  |                     |          | AFR  |                     |          | META |                       |
|-------------|--------------------|---------|------|---------------------|-------------------------------|------|---------------------|------------------------|------|---------------------|----------|------|---------------------|----------|------|-----------------------|
|             |                    |         | Frq  | OR<br>(95%CI)       | <i>P</i>                      | Frq  | OR<br>(95%CI)       | <i>P</i>               | Frq  | OR<br>(95%CI)       | <i>P</i> | Frq  | OR<br>(95%CI)       | <i>P</i> | Phet | <i>I</i> <sup>2</sup> |
| rs7524755   | <i>TMCO1</i>       | T/C     | 0.12 | 1.33<br>(1.24-1.43) | <b>1.4 x 10<sup>-16</sup></b> | 0.13 | 1.51<br>(1.25-1.82) | 2.4 x 10 <sup>-5</sup> | 0.02 | 0.91<br>(0.47-1.77) | 0.79     | 0.12 | 1.44<br>(1.11-1.86) | 0.0053   | 0.39 | 0.9                   |
| rs56117902  | <i>FMNL2</i>       | A/C     | 0.46 | 0.88<br>(0.84-0.92) | 2.6 x 10 <sup>-7</sup>        | 0.54 | 0.92<br>(0.79-1.06) | 0.24                   | 0.94 | 0.85<br>(0.62-1.17) | 0.32     | 0.79 | 0.76<br>(0.61-0.95) | 0.017    | 0.58 | 0.0                   |
| rs59521811  | <i>AFAP1</i>       | T/C     | 0.68 | 0.84<br>(0.80-0.89) | <b>2.7 x 10<sup>-11</sup></b> | 0.59 | 0.84<br>(0.73-0.98) | 0.026                  | 0.66 | 0.94<br>(0.81-1.10) | 0.44     | 0.56 | 0.98<br>(0.81-1.18) | 0.84     | 0.28 | 21.5                  |
| rs6913530   | <i>near CDKN1A</i> | G/A     | 0.78 | 0.87<br>(0.82-0.92) | 7.0 x 10 <sup>-7</sup>        | 0.81 | 0.69<br>(0.58-0.83) | 5.9 x 10 <sup>-5</sup> | 0.62 | 0.92<br>(0.80-1.07) | 0.29     | 0.88 | 0.90<br>(0.68-1.18) | 0.43     | 0.08 | 55.7                  |
| rs9494457   | <i>PDE7B</i>       | T/A     | 0.61 | 1.17<br>(1.11-1.23) | <b>1.0 x 10<sup>-9</sup></b>  | 0.58 | 1.25<br>(1.07-1.45) | 0.0050                 | 0.66 | 1.03<br>(0.88-1.20) | 0.71     | 0.63 | 1.16<br>(0.95-1.42) | 0.16     | 0.37 | 4.3                   |
| rs149154973 | <i>near ELN</i>    | TG/T    | 0.96 | 0.70<br>(0.62-0.79) | <b>1.6 x 10<sup>-8</sup></b>  | 0.97 | 0.85<br>(0.54-1.31) | 0.45                   | 0.98 | 1.08<br>(0.56-2.11) | 0.82     | 0.99 | 0.47<br>(0.22-0.99) | 0.047    | 0.41 | 0.0                   |
| rs10811645  | <i>CDKN2B-AS1</i>  | G/A     | 0.51 | 0.77<br>(0.73-0.81) | <b>2.4 x 10<sup>-27</sup></b> | 0.34 | 0.78<br>(0.66-0.92) | 0.0024                 | 0.15 | 0.68<br>(0.55-0.85) | 0.0008   | 0.31 | 0.83<br>(0.68-1.02) | 0.070    | 0.64 | 0.0                   |
| rs2472493   | <i>near ABCA1</i>  | G/A     | 0.42 | 1.19<br>(1.13-1.25) | <b>7.5 x 10<sup>-13</sup></b> | 0.37 | 1.16<br>(1.00-1.35) | 0.046                  | 0.56 | 0.99<br>(0.86-1.15) | 0.90     | 0.35 | 1.25<br>(1.04-1.51) | 0.018    | 0.11 | 49.7                  |
| rs324794    | <i>near TMTC2</i>  | G/T     | 0.45 | 0.86<br>(0.82-0.91) | <b>1.9 x 10<sup>-9</sup></b>  | 0.41 | 0.94<br>(0.81-1.09) | 0.38                   | 0.16 | 0.88<br>(0.71-1.07) | 0.20     | 0.32 | 0.90<br>(0.73-1.10) | 0.31     | 0.77 | 0.0                   |
| rs35155027  | <i>SIX1/SIX6</i>   | G/C     | 0.41 | 1.18<br>(1.12-1.24) | <b>4.2 x 10<sup>-11</sup></b> | 0.41 | 1.10<br>(0.95-1.28) | 0.20                   | 0.77 | 1.35<br>(1.12-1.64) | 0.0021   | 0.84 | 1.03<br>(0.81-1.30) | 0.82     | 0.26 | 25.4                  |
| rs2593221   | <i>TCF12</i>       | A/G     | 0.76 | 0.86<br>(0.82-0.91) | <b>4.5 x 10<sup>-8</sup></b>  | 0.76 | 0.85<br>(0.72-1.00) | 0.053                  | 0.83 | 0.80<br>(0.67-0.96) | 0.019    | 0.71 | 0.96<br>(0.79-1.18) | 0.71     | 0.63 | 0.0                   |
| rs9913911   | <i>GAS7</i>        | A/G     | 0.62 | 1.24<br>(1.18-1.30) | <b>6.9 x 10<sup>-17</sup></b> | 0.67 | 1.17<br>(1.00-1.37) | 0.055                  | 0.52 | 1.09<br>(0.94-1.26) | 0.26     | 0.79 | 1.37<br>(1.07-1.75) | 0.012    | 0.27 | 23.9                  |

Abbreviations: NHW, non-Hispanic whites; H/L, Hispanic/Latinos; EAS, East Asians; AA, African-Americans; Frq, frequency of effect allele; OR, odds ratio; *P*-values in bold achieved genome-wide level of significance ( $P < 5 \times 10^{-8}$ ); loci highlighted in grey are novel; *Phet*, heterogeneity *P*-values from Cochrane's Q statistic; *I*<sup>2</sup>, heterogeneity index (0–100%)

**Supplementary Table 3.** Characteristics of the glaucoma cases and controls from UK Biobank

|                       |                                                    | <b>Controls</b> | <b>Cases</b>   |
|-----------------------|----------------------------------------------------|-----------------|----------------|
| <b>Total</b>          | N, (proportion that are cases)                     | 169,561         | 7,329 (4.1%)   |
| <b>Sex</b>            | Women,<br>N, (proportion that are cases)           | 92,327          | 3,460 (3.6%)   |
|                       | Men<br>N, (proportion that are cases)              | 77,234          | 3,869 (4.8%)   |
| <b>Race/Ethnicity</b> | European<br>N, (proportion that are cases)         | 155,514         | 6,687 (4.1%)   |
|                       | South Asian<br>N, (proportion that are cases)      | 4,916           | 204 (4.0%)     |
|                       | African British<br>N, (proportion that are cases)  | 4,831           | 272 (5.3%)     |
|                       | Mixed Ancestries<br>N, (proportion that are cases) | 3,427           | 144 (4.0%)     |
|                       | East Asian<br>N, (proportion that are cases)       | 873             | 22 (2.5%)      |
| <b>Age (years)</b>    | Mean $\pm$ SD                                      | 58.0 $\pm$ 8.2  | 62.0 $\pm$ 6.4 |

Abbreviations: N, number; SD, standard deviation; Age, age when glaucoma was first diagnosed within cases and age at recruitment within controls

**Supplementary Table 4.** Conditional analysis results from the GERA multiethnic meta-analysis

| <b>SNP</b> | <b>Chr</b> | <b>Pos</b> | <b>Locus</b>      | <b>Alleles</b> | <b>OR (95%CI)</b> | <b>P</b>               |
|------------|------------|------------|-------------------|----------------|-------------------|------------------------|
| rs74899281 | 1          | 165827908  | <i>UCK2</i>       | AG/A           | 0.52 (0.39-0.71)  | 2.5 x 10 <sup>-5</sup> |
| rs2069418  | 9          | 22009698   | <i>CDKN2B-AS1</i> | G/C            | 0.90 (0.86-0.95)  | 1.4 x 10 <sup>-5</sup> |
| rs76958481 | 14         | 61125237   | <i>near SIX1</i>  | C/T            | 0.51 (0.36-0.71)  | 9.1 x 10 <sup>-5</sup> |

Abbreviations: SNP, single nucleotide polymorphism; Chr, chromosome; Pos, position; OR, odds ratio; *P*, *P*-values

**Supplementary Table 5.** Comparison of the effects of lead SNPs from the GERA discovery GWAS for POAG, HTG, NTG, and IOP

| SNP             | Chr | Locus              | Alleles | POAG             |                               | IOP                  |                               | NTG              |                               | HTG              |                               |
|-----------------|-----|--------------------|---------|------------------|-------------------------------|----------------------|-------------------------------|------------------|-------------------------------|------------------|-------------------------------|
|                 |     |                    |         | OR (95%CI)       | <i>P</i>                      | $\beta$ (95%CI)      | <i>P</i>                      | OR (95%CI)       | <i>P</i>                      | OR (95%CI)       | <i>P</i>                      |
| High IOP loci   |     |                    |         |                  |                               |                      |                               |                  |                               |                  |                               |
| rs7524755       | 1   | <i>TMCO1</i>       | T/C     | 1.35 (1.27-1.44) | <b>1.6 x 10<sup>-21</sup></b> | 0.22 (0.19, 0.29)    | <b>1.7 x 10<sup>-19</sup></b> | 1.09 (0.91-1.30) | 0.34                          | 1.39 (1.31-1.49) | <b>1.4 x 10<sup>-23</sup></b> |
| rs56117902      | 2   | <i>FMNL2</i>       | A/C     | 0.88 (0.84-0.92) | <b>1.0 x 10<sup>-8</sup></b>  | -0.07 (-0.11, -0.04) | 2.1 x 10 <sup>-6</sup>        | 0.99 (0.88-1.11) | 0.84                          | 0.86 (0.82-0.91) | <b>1.2 x 10<sup>-9</sup></b>  |
| rs59521811      | 4   | <i>AFAP1</i>       | T/C     | 0.86 (0.82-0.90) | <b>1.2 x 10<sup>-11</sup></b> | -0.13 (-0.16, -0.10) | <b>3.6 x 10<sup>-15</sup></b> | 0.86 (0.77-0.96) | 5.9 x 10 <sup>-3</sup>        | 0.86 (0.82-0.90) | <b>3.2 x 10<sup>-10</sup></b> |
| rs9494457       | 6   | <i>PDE7B</i>       | T/A     | 1.16 (1.11-1.22) | <b>3.0 x 10<sup>-11</sup></b> | 0.07 (0.04, 0.10)    | 1.7 x 10 <sup>-6</sup>        | 1.07 (0.96-1.19) | 0.22                          | 1.18 (1.13-1.24) | <b>1.2 x 10<sup>-11</sup></b> |
| rs2472493       | 9   | <i>near ABCA1</i>  | G/A     | 1.17 (1.12-1.22) | <b>1.2 x 10<sup>-13</sup></b> | 0.17 (0.14, 0.20)    | <b>1.1 x 10<sup>-28</sup></b> | 1.13 (1.02-1.25) | 0.02                          | 1.18 (1.13-1.23) | <b>1.6 x 10<sup>-12</sup></b> |
| rs9913911       | 17  | <i>GAS7</i>        | A/G     | 1.22 (1.17-1.28) | <b>1.5 x 10<sup>-18</sup></b> | 0.21 (0.18, 0.24)    | <b>1.4 x 10<sup>-42</sup></b> | 1.12 (1.00-1.25) | 0.04                          | 1.24 (1.18-1.30) | <b>1.3 x 10<sup>-18</sup></b> |
| Normal IOP Loci |     |                    |         |                  |                               |                      |                               |                  |                               |                  |                               |
| rs6913530       | 6   | <i>near CDKN1A</i> | G/A     | 0.86 (0.82-0.90) | <b>2.3 x 10<sup>-9</sup></b>  | -0.04 (-0.07, 0.00)  | 0.032                         | 0.75 (0.67-0.84) | 8.8 x 10 <sup>-7</sup>        | 0.88 (0.84-0.93) | 5.9 x 10 <sup>-6</sup>        |
| rs149154973     | 7   | <i>near ELN</i>    | TG/T    | 0.70 (0.62-0.79) | <b>3.9 x 10<sup>-9</sup></b>  | -0.01 (-0.10, 0.08)  | 0.87                          | 0.66 (0.49-0.90) | 9.3 x 10 <sup>-3</sup>        | 0.71 (0.63-0.80) | 7.7 x 10 <sup>-8</sup>        |
| rs10811645      | 9   | <i>CDKN2B-AS1</i>  | G/A     | 0.77 (0.74-0.80) | <b>2.8 x 10<sup>-32</sup></b> | 0.01 (-0.02, 0.04)   | 0.65                          | 0.61 (0.54-0.69) | <b>6.2 x 10<sup>-17</sup></b> | 0.80 (0.76-0.83) | <b>1.0 x 10<sup>-21</sup></b> |
| rs324794        | 12  | <i>near TMTC2</i>  | G/T     | 0.87 (0.83-0.91) | <b>6.1 x 10<sup>-10</sup></b> | -0.02 (-0.05, 0.01)  | 0.22                          | 0.83 (0.74-0.93) | 1.1 x 10 <sup>-3</sup>        | 0.88 (0.84-0.92) | 5.6 x 10 <sup>-8</sup>        |
| rs35155027      | 14  | <i>SIX1/SIX6</i>   | G/C     | 1.17 (1.12-1.23) | <b>1.1 x 10<sup>-12</sup></b> | -0.01 (-0.04, 0.02)  | 0.43                          | 1.37 (1.22-1.54) | 4.7 x 10 <sup>-8</sup>        | 1.14 (1.09-1.20) | <b>2.8 x 10<sup>-8</sup></b>  |
| rs2593221       | 15  | <i>TCF12</i>       | A/G     | 0.86 (0.82-0.90) | <b>8.5 x 10<sup>-10</sup></b> | -0.05 (-0.09, -0.02) | 0.0028                        | 0.84 (0.75-0.95) | 4.0 x 10 <sup>-3</sup>        | 0.86 (0.82-0.91) | <b>2.1 x 10<sup>-8</sup></b>  |

Abbreviations: OR, odds ratio; *P*-values in bold achieved genome-wide level of significance ( $P < 5 \times 10^{-8}$ ); POAG, primary open angle glaucoma; HTG, high tension glaucoma; NTG, normal tension glaucoma; IOP, intraocular pressure; loci highlighted in grey are novel. Here, we report the lead SNP for each independent locus identified in the GERA discovery GWAS of POAG. Note: “High IOP loci” were defined as loci significantly associated with IOP (higher or lower) at a Bonferroni level of significance ( $P < 0.0014$  for 12 SNPs in 3 analyses). In contrast, “Normal IOP loci” were defined as loci not associated with IOP (meaning with a  $P \geq 0.0014$ ).

**Supplementary Table 6.** Replication of SNP associations reported in previous NTG GWAS studies in the GERA discovery cohort

| Chr | SNP       | Nearest Gene      | Ref | Alleles | Meta-analysis       |                               |      |                       | NHW                 |                               | H/L                 |          | EAS                 |          | AA                  |          |
|-----|-----------|-------------------|-----|---------|---------------------|-------------------------------|------|-----------------------|---------------------|-------------------------------|---------------------|----------|---------------------|----------|---------------------|----------|
|     |           |                   |     |         | OR (95%CI)          | <i>P</i>                      | Phet | <i>I</i> <sup>2</sup> | OR (95%CI)          | <i>P</i>                      | OR (95%CI)          | <i>P</i> | OR (95%CI)          | <i>P</i> | OR (95%CI)          | <i>P</i> |
| 8   | rs284491  | -                 | 3,4 | C/T     | 1.06<br>(0.95-1.19) | 0.29                          | 0.43 | 0.0                   | 1.12<br>(0.97-1.29) | 0.11                          | 1.05<br>(0.73-1.51) | 0.79     | 0.99<br>(0.79-1.25) | 0.94     | 0.75<br>(0.46-1.24) | 0.26     |
| 9   | rs1333037 | <i>CDKN2B-AS1</i> | 3,4 | C/T     | 0.59<br>(0.52-0.67) | <b>1.3 x 10<sup>-16</sup></b> | 0.99 | 0.0                   | 0.59<br>(0.51-0.68) | <b>1.3 x 10<sup>-13</sup></b> | 0.58<br>(0.36-0.92) | 0.02     | 0.58<br>(0.39-0.85) | 0.01     | 0.68<br>(0.27-1.73) | 0.42     |
| 12  | rs2041895 | <i>TMEM263</i>    | 3   | C/G     | 1.04<br>(0.94-1.16) | 0.43                          | 0.50 | 0.0                   | 0.98<br>(0.86-1.12) | 0.81                          | 1.13<br>(0.79-1.59) | 0.51     | 1.20<br>(0.95-1.51) | 0.12     | 1.10<br>(0.63-1.93) | 0.72     |

Abbreviations: NHW, non-Hispanic whites; H/L, Hispanic/Latinos; EAS, East Asians; AA, African Americans; *P*-values in bold achieved genome-wide level of significance ( $P < 5 \times 10^{-8}$ ); Phet, heterogeneity *P*-values from Cochrane's Q statistic; *I*<sup>2</sup>, heterogeneity index (0–100%)

**Supplementary Table 7.** Replication of SNP associations reported in previous POAG GWAS studies in the GERA cohort

| SNP         | Nearest Gene       | Ref | Alleles | Meta-analysis       |                               |      |                | NHW                 |                               | H/L                 |                        | EAS                 |        | AA                  |       |
|-------------|--------------------|-----|---------|---------------------|-------------------------------|------|----------------|---------------------|-------------------------------|---------------------|------------------------|---------------------|--------|---------------------|-------|
|             |                    |     |         | OR (95%CI)          | P                             | Phet | r <sup>2</sup> | OR (95%CI)          | P                             | OR (95%CI)          | P                      | OR (95%CI)          | P      | OR (95%CI)          | P     |
| rs1192415   | <i>CDC7-TGFBP3</i> | 5   | G/A     | 1.12<br>(1.06-1.18) | 2.4 x 10 <sup>-5</sup>        | 0.80 | 0.0            | 1.13<br>(1.06-1.20) | 0.00011                       | 1.17<br>(0.99-1.38) | 0.06                   | 1.05<br>(0.86-1.29) | 0.61   | 1.04<br>(0.81-1.33) | 0.75  |
| rs4656461   | <i>TMCO1</i>       | 6   | G/A     | 1.33<br>(1.25-1.41) | <b>1.2 x 10<sup>-19</sup></b> | 0.57 | 0.0            | 1.33<br>(1.25-1.43) | <b>1.3 x 10<sup>-16</sup></b> | 1.42<br>(1.17-1.71) | 0.00029                | 0.95<br>(0.49-1.84) | 0.88   | 1.22<br>(0.97-1.53) | 0.09  |
| rs7588567   | <i>NCKAP5</i>      | 7   | T/C     | NA                  | NA                            | NA   | NA             | 0.98<br>(0.92-1.04) | 0.45                          | 0.91<br>(0.76-1.09) | 0.32                   | 1.03<br>(0.89-1.20) | 0.65   | 0.86<br>(0.68-1.10) | 0.23  |
| rs4619890   | <i>AFAP1</i>       | 8   | G/A     | 1.08<br>(1.04-1.13) | 0.00025                       | 0.23 | 29.6           | 1.08<br>(1.03-1.13) | 0.0015                        | 1.22<br>(1.05-1.42) | 0.0092                 | 0.97<br>(0.84-1.14) | 0.75   | 1.10<br>(0.88-1.39) | 0.40  |
| rs2745572   | <i>FOXC1</i>       | 3   | A/G     | 1.12<br>(1.07-1.18) | 5.2 x 10 <sup>-7</sup>        | 0.01 | 73.1           | 1.16<br>(1.10-1.22) | <b>1.8 x 10<sup>-8</sup></b>  | 0.98<br>(0.84-1.14) | 0.80                   | 0.94<br>(0.81-1.09) | 0.43   | 1.29<br>(1.01-1.65) | 0.05  |
| rs11969985  | <i>GMDS</i>        | 8   | G/A     | 1.13<br>(1.06-1.20) | 0.00017                       | 0.21 | 33.1           | 1.17<br>(1.09-1.26) | 2.4 x 10 <sup>-5</sup>        | 1.10<br>(0.89-1.36) | 0.38                   | 0.99<br>(0.83-1.19) | 0.94   | 0.98<br>(0.79-1.22) | 0.85  |
| rs67530707  | <i>near CDKN1A</i> | 9   | TCA/T   | 0.86<br>(0.82-0.91) | <b>3.7 x 10<sup>-9</sup></b>  | 0.10 | 52.4           | 0.87<br>(0.82-0.92) | 8.3 x 10 <sup>-7</sup>        | 0.70<br>(0.58-0.84) | 9.7 x 10 <sup>-5</sup> | 0.92<br>(0.79-1.07) | 0.27   | 0.92<br>(0.70-1.22) | 0.57  |
| rs4236601   | <i>CAV1/CAV2</i>   | 10  | G/A     | 0.91<br>(0.87-0.95) | 1.0 x 10 <sup>-4</sup>        | 0.71 | 0.0            | 0.91<br>(0.86-0.96) | 0.00042                       | 0.96<br>(0.81-1.14) | 0.66                   | 0.77<br>(0.49-1.21) | 0.25   | 0.85<br>(0.70-1.04) | 0.11  |
| rs4977756   | <i>CDKN2B-AS1</i>  | 6   | G/A     | 0.81<br>(0.77-0.84) | <b>9.7 x 10<sup>-21</sup></b> | 0.01 | 75.0           | 0.79<br>(0.75-0.83) | <b>4.3 x 10<sup>-20</sup></b> | 0.74<br>(0.62-0.89) | 0.00093                | 0.87<br>(0.73-1.03) | 0.10   | 1.11<br>(0.91-1.36) | 0.29  |
| rs2472493   | <i>ABCA1</i>       | 8   | G/A     | 1.17<br>(1.12-1.22) | <b>1.2 x 10<sup>-13</sup></b> | 0.11 | 49.7           | 1.19<br>(1.13-1.25) | <b>7.5 x 10<sup>-13</sup></b> | 1.16<br>(1.00-1.35) | 0.046                  | 0.99<br>(0.86-1.15) | 0.90   | 1.25<br>(1.04-1.51) | 0.018 |
| rs542340    | <i>DNAJC24</i>     | 11  | A/G     | NA                  | NA                            | NA   | NA             | NA                  | NA                            | NA                  | NA                     | NA                  | NA     | 0.68<br>(0.32-1.47) | 0.33  |
| rs58073046  | <i>ARHGEF12</i>    | 12  | A/G     | 0.87<br>(0.82-0.93) | 4.3 x 10 <sup>-5</sup>        | 0.81 | 0.0            | 0.86<br>(0.80-0.92) | 4.6 x 10 <sup>-5</sup>        | 0.97<br>(0.73-1.30) | 0.86                   | 0.91<br>(0.75-1.10) | 0.33   | 0.94<br>(0.56-1.56) | 0.80  |
| rs7137828   | <i>ATXN2</i>       | 3   | C/T     | 0.93<br>(0.89-0.98) | 0.0034                        | 0.18 | 39.4           | 0.93<br>(0.89-0.98) | 0.0033                        | 0.97<br>(0.83-1.14) | 0.73                   | 0.40<br>(0.17-0.92) | 0.030  | 1.05<br>(0.78-1.41) | 0.74  |
| rs199748604 | <i>TRIM9-TMX1</i>  | 11  | T/TG    | 1.01<br>(0.92-1.12) | 0.80                          | 0.06 | 64.4           | 1.02<br>(0.92-1.13) | 0.70                          | 1.25<br>(0.79-1.98) | 0.34                   | 0.80<br>(0.50-1.26) | 0.33   | 0.48<br>(0.25-0.94) | 0.031 |
| rs10483727  | <i>SIX1/SIX6</i>   | 4   | T/C     | 1.17<br>(1.12-1.22) | <b>1.6 x 10<sup>-12</sup></b> | 0.22 | 31.6           | 1.18<br>(1.12-1.23) | <b>6.3 x 10<sup>-11</sup></b> | 1.11<br>(0.96-1.28) | 0.17                   | 1.35<br>(1.12-1.64) | 0.0020 | 1.00<br>(0.79-1.27) | 0.97  |
| rs192917960 | <i>RBFOX1</i>      | 11  | C/T     | NA                  | NA                            | NA   | NA             | NA                  | NA                            | NA                  | NA                     | NA                  | NA     | 1.19<br>(0.52-2.70) | 0.68  |
| rs3785176   | <i>PMM2</i>        | 13  | A/C     | 0.98<br>(0.93-1.03) | 0.35                          | 0.77 | 0.0            | 0.99<br>(0.93-1.04) | 0.61                          | 1.00<br>(0.82-1.20) | 0.96                   | 0.91<br>(0.77-1.06) | 0.22   | 0.93<br>(0.70-1.23) | 0.61  |
| rs9897123   | <i>GAS7</i>        | 3   | C/T     | 1.18<br>(1.13-1.23) | <b>1.1 x 10<sup>-13</sup></b> | 0.35 | 9.2            | 1.20<br>(1.14-1.26) | <b>1.1 x 10<sup>-13</sup></b> | 1.08<br>(0.93-1.26) | 0.31                   | 1.08<br>(0.93-1.26) | 0.33   | 1.13<br>(0.93-1.37) | 0.23  |
| rs35934224  | <i>TXNRD2</i>      | 3   | C/T     | 1.15<br>(1.08-1.22) | 2.8 x 10 <sup>-5</sup>        | 0.60 | 0.0            | 1.17<br>(1.09-1.26) | 2.9 x 10 <sup>-5</sup>        | 1.04<br>(0.84-1.28) | 0.72                   | 1.27<br>(0.87-1.84) | 0.22   | 1.06<br>(0.85-1.31) | 0.60  |



Abbreviations: Chr, chromosome; SNP, single nucleotide polymorphism; NHW, non-Hispanic whites; H/L, Hispanic/Latinos; EAS, East Asians; AA, African Americans; *P*-values in bold achieved genome-wide level of significance ( $P < 5 \times 10^{-8}$ ); *P*<sub>het</sub>, heterogeneity *P*-values from Cochrane's Q statistic; *I*<sup>2</sup>, heterogeneity index (0–100%); *NCKAP5* rs7588567 had a moderate imputation quality score *r*<sup>2</sup> in non-Hispanic whites (*r*<sup>2</sup>=0.64), as well as in Hispanic/Latinos (*r*<sup>2</sup>=0.63) and in African-Americans (*r*<sup>2</sup>=0.61). For this reason, rs7588567 was excluded from the meta-analysis across the 4 race/ethnicity groups.

**Supplementary Table 8.** Lead SNPs ( $P < 5 \times 10^{-8}$ ) in the multiethnic meta-analysis (GERA+UKB)

| Chr | Pos       | SNP        | Nearest Gene           | Alleles | Meta-analysis (GERA+UKB) |                       |       |                       | GERA             |                       | UKB              |                       |
|-----|-----------|------------|------------------------|---------|--------------------------|-----------------------|-------|-----------------------|------------------|-----------------------|------------------|-----------------------|
|     |           |            |                        |         | OR (95%CI)               | <i>P</i>              | Phet  | <i>r</i> <sup>2</sup> | OR (95%CI)       | <i>P</i>              | OR (95%CI)       | <i>P</i>              |
| 1   | 88227120  | rs41461152 | <i>LMO4/PKN2-AS1</i>   | T/G     | 1.09 (1.06-1.12)         | $4.1 \times 10^{-9}$  | 0.27  | 17.3                  | 1.11 (1.06-1.16) | $5.7 \times 10^{-6}$  | 1.07 (1.04-1.11) | $9.6 \times 10^{-5}$  |
| 1   | 103385373 | rs993471   | <i>COL11A1</i>         | G/A     | 1.08 (1.05-1.11)         | $2.0 \times 10^{-8}$  | 0.98  | 0                     | 1.08 (1.03-1.13) | 0.00055               | 1.08 (1.04-1.12) | $9.9 \times 10^{-6}$  |
| 1   | 165739598 | rs2814471  | <i>TMCO1</i>           | C/T     | 1.37 (1.32-1.42)         | $2.0 \times 10^{-62}$ | 0.42  | 0                     | 1.34 (1.26-1.43) | $2.0 \times 10^{-20}$ | 1.39 (1.32-1.45) | $7.5 \times 10^{-44}$ |
| 2   | 55933014  | rs2627761  | <i>near PNPT1</i>      | C/T     | 1.11 (1.07-1.15)         | $6.1 \times 10^{-10}$ | 0.32  | 0.5                   | 1.13 (1.07-1.19) | $3.0 \times 10^{-6}$  | 1.09 (1.05-1.14) | $2.9 \times 10^{-5}$  |
| 2   | 66567896  | rs2860235  | <i>near MEIS1</i>      | T/C     | 0.93 (0.90-0.95)         | $3.9 \times 10^{-8}$  | 0.55  | 0                     | 0.94 (0.90-0.98) | 0.0033                | 0.92 (0.89-0.95) | $2.9 \times 10^{-6}$  |
| 2   | 111680155 | rs3789134  | <i>ACOXL</i>           | T/C     | 1.09 (1.06-1.12)         | $1.9 \times 10^{-9}$  | 0.87  | 0                     | 1.09 (1.04-1.14) | 0.00012               | 1.09 (1.05-1.12) | $4.0 \times 10^{-6}$  |
| 2   | 153357541 | rs6434068  | <i>FMNL2</i>           | G/C     | 0.91 (0.89-0.94)         | $1.9 \times 10^{-11}$ | 0.44  | 0                     | 0.90 (0.86-0.94) | $2.4 \times 10^{-6}$  | 0.92 (0.89-0.95) | $1.2 \times 10^{-6}$  |
| 2   | 213758234 | rs56335522 | <i>IKZF2</i>           | G/C     | 1.19 (1.13-1.24)         | $1.7 \times 10^{-13}$ | 0.75  | 0                     | 1.20 (1.11-1.29) | $2.0 \times 10^{-6}$  | 1.18 (1.11-1.25) | $1.7 \times 10^{-8}$  |
| 2   | 234271522 | rs34339006 | <i>DGKD</i>            | C/T     | 0.93 (0.90-0.95)         | $1.7 \times 10^{-8}$  | 0.14  | 54                    | 0.95 (0.91-0.99) | 0.019                 | 0.91 (0.88-0.94) | $9.4 \times 10^{-8}$  |
| 3   | 25574186  | rs1153606  | <i>RARB</i>            | A/G     | 1.10 (1.06-1.14)         | $3.4 \times 10^{-8}$  | 0.97  | 0                     | 1.10 (1.04-1.16) | 0.00046               | 1.10 (1.05-1.15) | $2.0 \times 10^{-5}$  |
| 3   | 85138818  | rs9883252  | <i>CADM2</i>           | T/C     | 1.11 (1.08-1.14)         | $6.1 \times 10^{-14}$ | 0.69  | 0                     | 1.10 (1.05-1.15) | $2.0 \times 10^{-5}$  | 1.11 (1.08-1.15) | $6.2 \times 10^{-10}$ |
| 3   | 150063454 | rs73162480 | <i>TSC22D2</i>         | G/T     | 1.15 (1.09-1.20)         | $1.8 \times 10^{-8}$  | 0.81  | 0                     | 1.15 (1.07-1.25) | 0.00043               | 1.14 (1.08-1.21) | $1.1 \times 10^{-5}$  |
| 3   | 186131600 | rs9853115  | <i>DGKG/TBCCD1</i>     | T/A     | 1.10 (1.08-1.13)         | $1.9 \times 10^{-13}$ | 0.7   | 0                     | 1.10 (1.05-1.14) | $2.2 \times 10^{-5}$  | 1.11 (1.07-1.15) | $1.7 \times 10^{-9}$  |
| 3   | 188066437 | rs6771736  | <i>LPP</i>             | C/G     | 0.92 (0.89-0.95)         | $4.9 \times 10^{-8}$  | 0.78  | 0                     | 0.92 (0.88-0.97) | 0.0012                | 0.92 (0.88-0.95) | $1.1 \times 10^{-5}$  |
| 4   | 7916540   | rs6857814  | <i>AFAP1</i>           | A/G     | 0.86 (0.84-0.89)         | $5.8 \times 10^{-27}$ | 0.96  | 0                     | 0.86 (0.83-0.90) | $4.9 \times 10^{-11}$ | 0.86 (0.83-0.89) | $1.8 \times 10^{-17}$ |
| 5   | 14837332  | rs76325372 | <i>ANKH</i>            | A/C     | 1.12 (1.08-1.15)         | $6.7 \times 10^{-13}$ | 0.18  | 45.2                  | 1.09 (1.04-1.14) | 0.00045               | 1.14 (1.09-1.18) | $1.4 \times 10^{-10}$ |
| 5   | 172588027 | rs255303   | <i>BNIP1</i>           | G/T     | 1.08 (1.05-1.11)         | $3.5 \times 10^{-8}$  | 0.22  | 32.2                  | 1.06 (1.01-1.10) | 0.017                 | 1.09 (1.06-1.13) | $3.0 \times 10^{-7}$  |
| 6   | 642017    | rs72835984 | <i>EXOC2</i>           | C/T     | 0.86 (0.83-0.89)         | $1.7 \times 10^{-15}$ | 0.96  | 0                     | 0.86 (0.81-0.92) | $1.1 \times 10^{-6}$  | 0.86 (0.82-0.90) | $2.9 \times 10^{-10}$ |
| 6   | 1989604   | rs9392348  | <i>GMD5</i>            | G/A     | 1.11 (1.08-1.15)         | $1.7 \times 10^{-10}$ | 0.13  | 55.6                  | 1.15 (1.09-1.21) | $2.9 \times 10^{-7}$  | 1.09 (1.05-1.14) | $4.4 \times 10^{-5}$  |
| 6   | 51406848  | rs17752199 | <i>near PKHD1</i>      | A/G     | 1.14 (1.09-1.19)         | $4.7 \times 10^{-9}$  | 0.07  | 69.3                  | 1.20 (1.12-1.29) | $3.9 \times 10^{-7}$  | 1.10 (1.04-1.17) | 0.00059               |
| 6   | 136458593 | rs3757155  | <i>PDE7B</i>           | C/T     | 1.12 (1.09-1.15)         | $9.5 \times 10^{-15}$ | 0.021 | 81.3                  | 1.16 (1.11-1.22) | $3.2 \times 10^{-11}$ | 1.09 (1.05-1.13) | $4.0 \times 10^{-6}$  |
| 6   | 158976277 | rs4709212  | <i>TMEM181</i>         | C/A     | 1.09 (1.06-1.12)         | $7.8 \times 10^{-9}$  | 0.5   | 0                     | 1.08 (1.03-1.13) | 0.0017                | 1.10 (1.06-1.14) | $1.0 \times 10^{-6}$  |
| 6   | 170448016 | rs3012455  | <i>near FAM120B</i>    | A/G     | 1.14 (1.09-1.20)         | $9.3 \times 10^{-9}$  | 0.82  | 0                     | 1.15 (1.06-1.24) | 0.00042               | 1.14 (1.08-1.20) | $5.7 \times 10^{-6}$  |
| 7   | 11677452  | rs2526101  | <i>THSD7A</i>          | A/G     | 0.92 (0.89-0.94)         | $1.4 \times 10^{-10}$ | 0.14  | 53.1                  | 0.94 (0.90-0.98) | 0.0056                | 0.90 (0.87-0.93) | $2.5 \times 10^{-9}$  |
| 7   | 80848822  | rs327636   | <i>SEMA3C/CACNA2D1</i> | A/G     | 1.08 (1.06-1.12)         | $7.0 \times 10^{-9}$  | 0.43  | 0                     | 1.07 (1.02-1.12) | 0.0030                | 1.09 (1.06-1.13) | $4.7 \times 10^{-7}$  |
| 7   | 116154831 | rs6969706  | <i>CAV2/CAV1</i>       | G/T     | 0.90 (0.88-0.93)         | $3.8 \times 10^{-12}$ | 0.68  | 0                     | 0.91 (0.87-0.95) | $9.6 \times 10^{-5}$  | 0.90 (0.86-0.93) | $8.4 \times 10^{-9}$  |
| 7   | 117632975 | rs6947612  | <i>CTTNBP2/LSM8</i>    | A/G     | 0.92 (0.90-0.95)         | $1.2 \times 10^{-8}$  | 0.64  | 0                     | 0.93 (0.89-0.97) | 0.0017                | 0.92 (0.89-0.95) | $1.7 \times 10^{-6}$  |
| 7   | 151505698 | rs62478245 | <i>PRKAG2</i>          | C/T     | 0.82 (0.76-0.88)         | $3.3 \times 10^{-8}$  | 0.98  | 0                     | 0.82 (0.71-0.93) | 0.0025                | 0.82 (0.75-0.89) | $3.7 \times 10^{-6}$  |

|    |           |            |                      |     |                  |                       |        |      |                  |                       |                  |                       |
|----|-----------|------------|----------------------|-----|------------------|-----------------------|--------|------|------------------|-----------------------|------------------|-----------------------|
| 8  | 108275781 | rs2514882  | <i>ANGPT1</i>        | C/T | 0.87 (0.84-0.91) | $7.3 \times 10^{-12}$ | 0.025  | 80   | 0.92 (0.87-0.98) | 0.0072                | 0.84 (0.80-0.88) | $2.2 \times 10^{-11}$ |
| 8  | 124552133 | rs62521287 | <i>FBXO32</i>        | C/T | 0.86 (0.81-0.90) | $8.3 \times 10^{-9}$  | 0.69   | 0    | 0.84 (0.77-0.92) | 0.00026               | 0.86 (0.81-0.92) | $7.5 \times 10^{-6}$  |
| 9  | 22051670  | rs944801   | <i>CDKN2B-AS1</i>    | G/C | 0.81 (0.79-0.83) | $2.1 \times 10^{-49}$ | 0.0017 | 89.9 | 0.76 (0.73-0.80) | $2.0 \times 10^{-30}$ | 0.84 (0.81-0.87) | $7.4 \times 10^{-23}$ |
| 9  | 107695848 | rs2472493  | <i>near ABCA1</i>    | G/A | 1.16 (1.13-1.19) | $6.1 \times 10^{-29}$ | 0.57   | 0    | 1.17 (1.12-1.22) | $1.2 \times 10^{-13}$ | 1.15 (1.12-1.19) | $6.3 \times 10^{-17}$ |
| 9  | 129382560 | rs1536907  | <i>LMX1B</i>         | A/G | 0.87 (0.84-0.90) | $1.1 \times 10^{-17}$ | 0.39   | 0    | 0.89 (0.84-0.94) | $2.5 \times 10^{-5}$  | 0.86 (0.83-0.90) | $6.6 \times 10^{-14}$ |
| 10 | 60374898  | rs2393455  | <i>BICC1</i>         | C/A | 1.08 (1.05-1.11) | $7.1 \times 10^{-9}$  | 0.66   | 0    | 1.09 (1.04-1.14) | $8.3 \times 10^{-5}$  | 1.08 (1.04-1.11) | $2.0 \times 10^{-5}$  |
| 10 | 96015793  | rs3891783  | <i>PLCE1</i>         | C/G | 0.93 (0.90-0.95) | $1.6 \times 10^{-8}$  | 0.08   | 67.2 | 0.95 (0.92-1.00) | 0.031                 | 0.91 (0.88-0.94) | $3.6 \times 10^{-8}$  |
| 11 | 47345100  | rs10838692 | <i>MADD</i>          | T/C | 0.92 (0.89-0.94) | $8.8 \times 10^{-10}$ | 0.44   | 0    | 0.91 (0.87-0.95) | $1.1 \times 10^{-5}$  | 0.93 (0.89-0.96) | $1.4 \times 10^{-5}$  |
| 11 | 65225319  | rs12808303 | <i>near NEAT1</i>    | C/G | 1.12 (1.08-1.16) | $3.5 \times 10^{-10}$ | 0.32   | 0    | 1.14 (1.08-1.21) | $4.8 \times 10^{-6}$  | 1.10 (1.06-1.15) | $1.0 \times 10^{-5}$  |
| 11 | 120207405 | rs7126413  | <i>near ARHGEF12</i> | A/G | 0.91 (0.89-0.94) | $1.1 \times 10^{-11}$ | 0.45   | 0    | 0.92 (0.88-0.96) | 0.00037               | 0.90 (0.87-0.94) | $5.2 \times 10^{-9}$  |
| 12 | 84038478  | rs12309467 | <i>TMTC2/SLC6A15</i> | C/G | 1.08 (1.06-1.11) | $1.9 \times 10^{-9}$  | 0.0024 | 89.2 | 1.14 (1.10-1.19) | $1.2 \times 10^{-9}$  | 1.05 (1.02-1.09) | 0.0037                |
| 13 | 22669058  | rs17075855 | <i>LINC00540</i>     | G/A | 0.91 (0.88-0.94) | $3.8 \times 10^{-8}$  | 0.74   | 0    | 0.90 (0.86-0.95) | 0.00016               | 0.91 (0.87-0.95) | $6.1 \times 10^{-5}$  |
| 14 | 61091401  | rs34935520 | <i>SIX1/SIX6</i>     | G/A | 1.15 (1.12-1.18) | $7.8 \times 10^{-24}$ | 0.27   | 17.5 | 1.17 (1.12-1.22) | $1.8 \times 10^{-12}$ | 1.14 (1.10-1.17) | $3.6 \times 10^{-13}$ |
| 15 | 57086199  | rs1647381  | <i>ZNF280D/TCF12</i> | C/G | 0.90 (0.87-0.93) | $8.2 \times 10^{-9}$  | 0.017  | 82.4 | 0.85 (0.80-0.90) | $5.7 \times 10^{-8}$  | 0.93 (0.89-0.97) | 0.0021                |
| 15 | 61952501  | rs2245899  | <i>near VPS13C</i>   | G/A | 1.08 (1.05-1.11) | $5.1 \times 10^{-9}$  | 0.25   | 24.5 | 1.10 (1.06-1.15) | $5.8 \times 10^{-6}$  | 1.07 (1.03-1.11) | 0.00011               |
| 17 | 10031183  | rs9913911  | <i>GAS7</i>          | A/G | 1.19 (1.15-1.22) | $9.1 \times 10^{-34}$ | 0.12   | 59.6 | 1.22 (1.17-1.28) | $1.5 \times 10^{-18}$ | 1.17 (1.13-1.21) | $2.2 \times 10^{-17}$ |
| 20 | 6473123   | rs6140010  | <i>near CASC20</i>   | A/G | 1.09 (1.06-1.12) | $7.6 \times 10^{-10}$ | 0.42   | 0    | 1.11 (1.06-1.16) | $8.4 \times 10^{-6}$  | 1.08 (1.04-1.12) | $1.5 \times 10^{-5}$  |
| 22 | 19856710  | rs58714937 | <i>near TXNRD2</i>   | C/T | 1.15 (1.11-1.20) | $1.1 \times 10^{-13}$ | 0.95   | 0    | 1.15 (1.09-1.23) | $2.6 \times 10^{-6}$  | 1.15 (1.10-1.21) | $8.3 \times 10^{-9}$  |
| 22 | 29105610  | rs5752774  | <i>CHEK2</i>         | C/T | 0.91 (0.88-0.93) | $1.8 \times 10^{-11}$ | 0.86   | 0    | 0.90 (0.86-0.95) | $2.1 \times 10^{-5}$  | 0.91 (0.88-0.94) | $1.9 \times 10^{-7}$  |

Abbreviations: Chr, chromosome; Pos, position; SNP, single nucleotide polymorphism; OR, odds ratio; P-values in bold achieved genome-wide level of significance ( $P < 5 \times 10^{-8}$ ); loci highlighted in grey are additional novel glaucoma loci identified in the multi-ethnic meta-analysis combining the GERA and UKB cohorts; *P*<sub>het</sub>, heterogeneity *P*-values from Cochrane's Q statistic; *I*<sup>2</sup>, heterogeneity index (0–100%)

**Supplementary Table 9.** Associations of genetic ancestries before and after adjusting for previously reported and newly identified SNPs

|                                   | Before adjustment |      |                      | After adjustment for 67 SNPs |       |                         |
|-----------------------------------|-------------------|------|----------------------|------------------------------|-------|-------------------------|
|                                   | $\beta$           | SE   | P-value              | $\beta$                      | SE    | P-value                 |
| <b>Non-Hispanic whites</b>        |                   |      |                      |                              |       |                         |
| PC1: Northwest vs. Southeast      | 4.30              | 2.33 | 0.06                 | 3.00                         | 2.31  | 0.19                    |
| PC2: Northeast vs. Southwest      | -0.42             | 2.50 | 0.87                 | -0.24                        | 2.49  | 0.92                    |
| GRS                               | -                 | -    | -                    | 0.63                         | 0.02  | $1.16 \times 10^{-200}$ |
| <b>Hispanic/Latinos</b>           |                   |      |                      |                              |       |                         |
| PC1: European vs. Native American | -34.78            | 6.43 | $6.3 \times 10^{-8}$ | -33.74                       | 6.46  | $1.74 \times 10^{-7}$   |
| PC2: Other vs. African            | 3.17              | 6.21 | 0.61                 | 6.57                         | 6.19  | 0.29                    |
| GRS                               | -                 | -    | -                    | 0.62                         | 0.067 | $1.25 \times 10^{-20}$  |
| <b>East Asians</b>                |                   |      |                      |                              |       |                         |
| PC1: East Asian vs. European      | 8.53              | 5.86 | 0.15                 | 4.51                         | 5.94  | 0.45                    |
| PC2: North vs. South              | 25.13             | 4.67 | $7.3 \times 10^{-8}$ | 28.72                        | 4.67  | $7.85 \times 10^{-10}$  |
| GRS                               | -                 | -    | -                    | 0.66                         | 0.09  | $7.39 \times 10^{-13}$  |
| <b>African Americans</b>          |                   |      |                      |                              |       |                         |
| PC1: African vs. European         | 10.37             | 3.98 | 0.01                 | 3.71                         | 4.13  | 0.37                    |
| PC2: East Asian vs. Other         | 1.24              | 3.73 | 0.74                 | 1.22                         | 3.81  | 0.75                    |
| GRS                               | -                 | -    | -                    | 0.70                         | 0.098 | $1.16 \times 10^{-12}$  |

Abbreviations: PC, principal component; GRS, genetic risk score;  $\beta$ , effect size estimates; SE, standard error; the 67 SNPs include previously reported and newly identified in GERA, UKB, and meta-analysis GERA+UKB

**Supplementary Table 10.** Expression of the genes in each identified locus that contained associated 95% credible set variants in adult human eye tissues

| Chr | Nearest Gene        | The Ocular Tissue Database <sup>14</sup> |             |              |        |       |       |             |                  |        |        |       | EyeSAGE <sup>15,16</sup> |     |         |          |
|-----|---------------------|------------------------------------------|-------------|--------------|--------|-------|-------|-------------|------------------|--------|--------|-------|--------------------------|-----|---------|----------|
|     |                     | Probe ID                                 | Choroid RPE | Ciliary Body | Cornea | Iris  | Lens  | Optic Nerve | Optic Nerve Head | Retina | Sclera | TM    | TM                       | MAC | RPE MAC | RPE Peri |
| 1   | <i>TMCO1</i>        | 2442134                                  | 205.4       | 138.5        | 224.6  | 138.8 | 149.5 | 143.4       | 205.3            | 145.4  | 119.1  | 188.4 | +                        | NA  | NA      | NA       |
| 2   | <i>STAM2</i>        | 2581430                                  | 128.1       | 113.3        | 139.6  | 105.3 | 236.4 | 163.1       | 229.7            | 151.8  | 123.2  | 161.9 | +                        | NA  | NA      | NA       |
| 2   | <i>FMNL2</i>        | 2510713                                  | 154.1       | 64.7         | 41     | 121   | 181.7 | 338.4       | 394.5            | 33.1   | 186.5  | 77.2  | +                        | -   | +       | +        |
| 3   | <i>CADM2</i>        | 2631556                                  | 35.6        | 45.6         | 49.2   | 36.1  | 68.6  | 61.0        | 46.8             | 97.2   | 39.4   | 44.4  | NA                       | NA  | NA      | NA       |
| 4   | <i>AFAP1</i>        | 2717518                                  | 46.3        | 34.2         | 60.5   | 44.5  | 50.7  | 59.2        | 60.2             | 46.4   | 43.8   | 59.6  | NA                       | NA  | NA      | NA       |
| 5   | <i>ANKH</i>         | 2849469                                  | 78.9        | 70.1         | 89.6   | 53.9  | 150.7 | 76.8        | 114.7            | 83.8   | 164.1  | 112.6 | +                        | +   | +       | +        |
| 6   | <i>EXOC2</i>        | 2938196                                  | 35.9        | 25.5         | 29.8   | 29.9  | 24.4  | 28.0        | 35.3             | 35.2   | 36.7   | 32.3  | +                        | NA  | NA      | NA       |
| 6   | <i>SRSF3</i>        | 2905118                                  | 558.1       | 462.2        | 271.3  | 975.4 | 257.9 | 206.2       | 294.8            | 224.6  | 178.9  | 356.1 | NA                       | NA  | NA      | NA       |
| 6   | <i>PDE7B</i>        | 2926969                                  | 57.0        | 73.0         | 35.6   | 12.4  | 23.5  | 58.6        | 52.1             | 55.1   | 110.4  | 136.1 | +                        | NA  | NA      | NA       |
| 7   | <i>THSD7A</i>       | NA                                       | NA          | NA           | NA     | NA    | NA    | NA          | NA               | NA     | NA     | NA    | +                        | NA  | NA      | NA       |
| 7   | <i>CAV1</i>         | 3020273                                  | 24.8        | 31.3         | 30.3   | 57.4  | 21.0  | 19.5        | 39.9             | 20.4   | 23.7   | 39.8  | +                        | +   | +       | -        |
| 7   | <i>CAV1</i>         | 3020302                                  | 37.1        | 49.6         | 68.6   | 95.4  | 283.6 | 37.6        | 81.0             | 35.3   | 48.4   | 98.4  | +                        | +   | +       | +        |
| 8   | <i>ANGPT1</i>       | 3148463                                  | 193.8       | 20.8         | 51.9   | 7.0   | 11.6  | 168.2       | 148.4            | 15.0   | 114.7  | 78.3  | +                        | -   | +       | +        |
| 9   | <i>CDKN2B-AS1</i>   | 3164914                                  | 35.9        | 32.7         | 37.0   | 29.7  | 22.5  | 33.3        | 33.2             | 26.0   | 31.7   | 33.4  | +                        | NA  | NA      | NA       |
| 9   | <i>LMX1B</i>        | 3189545                                  | 29.7        | 25.7         | 40.2   | 23.5  | 24.9  | 27.8        | 26.9             | 27.4   | 32.4   | 30.6  | NA                       | -   | +       | -        |
| 10  | <i>PLCE1</i>        | 3258477                                  | 132.5       | 104.7        | 26.8   | 26.4  | 172.4 | 165.9       | 167.7            | 60.6   | 140.1  | 143.2 | +                        | +   | +       | +        |
| 10  | <i>NOC3L</i>        | 3301011                                  | 48.6        | 40.7         | 47.6   | 37.6  | 83.2  | 39.0        | 49.2             | 36.4   | 36.2   | 50.7  | +                        | NA  | NA      | NA       |
| 11  | <i>TMEM136</i>      | 3352485                                  | 39.3        | 58.0         | 6.5    | 42.0  | 47.5  | 28.1        | 26.8             | 85.1   | 25.0   | 29.1  | NA                       | NA  | NA      | NA       |
| 11  | <i>ARHGEF12</i>     | 3352503                                  | 145.5       | 158.0        | 155.2  | 97.2  | 334.0 | 154.5       | 173.5            | 180.9  | 105.1  | 245.7 | +                        | +   | +       | -        |
| 14  | <i>C14orf39</i>     | 3567243                                  | 8.8         | 16.5         | 4.9    | 19.1  | 6.1   | 22.7        | 32.9             | 15.5   | 5.0    | 6.7   | NA                       | +   | -       | -        |
| 14  | <i>SIX6</i>         | 3538624                                  | 21.3        | 13.7         | 27.3   | 25.1  | 22.7  | 22.3        | 25.2             | 26.1   | 19.0   | 25.8  | +                        | +   | +       | +        |
| 14  | <i>LOC105378189</i> | NA                                       | NA          | NA           | NA     | NA    | NA    | NA          | NA               | NA     | NA     | NA    | NA                       | NA  | NA      | NA       |
| 15  | <i>ZNF280D</i>      | 3625823                                  | 84.5        | 69.4         | 63.3   | 103.0 | 77.4  | 92.9        | 92.7             | 83.5   | 73.8   | 116.1 | NA                       | NA  | NA      | NA       |
| 15  | <i>LOC1457</i>      | NA                                       | NA          | NA           | NA     | NA    | NA    | NA          | NA               | NA     | NA     | NA    | NA                       | NA  | NA      | NA       |
| 15  | <i>TCF12</i>        | 3595096                                  | 96.1        | 63.0         | 133.7  | 92.0  | 91.7  | 96.1        | 101.2            | 73.1   | 96.5   | 126.9 | +                        | +   | -       | +        |
| 17  | <i>GAS7</i>         | 3744965                                  | 100.6       | 63.2         | 19.7   | 84.8  | 188.1 | 219.1       | 230.5            | 102.9  | 77.2   | 128.0 | NA                       | +   | +       | +        |
| 22  | <i>TXNRD2</i>       | 3952880                                  | 39.5        | 35.2         | 37.0   | 30.2  | 40.0  | 31.4        | 33.7             | 30.3   | 35.0   | 35.9  | +                        | +   | +       | +        |
| 22  | <i>GNB1L</i>        | 3952825                                  | 25.7        | 28.0         | 25.5   | 22.6  | 25.0  | 28.1        | 22.8             | 20.5   | 25.6   | 23.9  | +                        | NA  | NA      | NA       |

**Abbreviations:** RPE, retinal pigment epithelium; TM, trabecular meshwork; MAC, retina macular; RPE Peri, RPE peripheral; na, not applicable. Genes highlighted in grey are in novel POAG loci identified in this study. In the Ocular Tissue Database<sup>14</sup> (OTDB), the gene expression is indicated as Affymetrix Probe Logarithmic Intensity Error (PLIER) number. The PLIER numbers were calculated by GC-background correction, PLIER normalization, log transformation and z-score calculation. The OTDB is also available at <https://genome.uiowa.edu/otdb/>. In the EyeSAGE<sup>15,16</sup> datasets from NEIBank, the gene expression is determined by tag counts in the Serial Analysis of Gene Expression (SAGE). All counts were summarized for each gene per tissue, and we added '+' to indicate the expression, or '-' to label the no expression while the counts are 0. The EyeSAGE is publicly available at the <http://neibank.nei.nih.gov/EyeSAGE/index.shtml>.

**Supplementary Table 11.** Expression pattern of glaucoma candidate genes in optic nerve head tissue

| Gene ID         | Log <sub>2</sub> (FC) Stage 1 | QV Stage 1 | Log <sub>2</sub> (FC) Stage 2 | QV Stage 2 | Log <sub>2</sub> (FC) Stage 3 | QV Stage 3 | Log <sub>2</sub> (FC) Stage 4 | QV Stage 4 | Log <sub>2</sub> (FC) Stage 5 | QV Stage 5 |
|-----------------|-------------------------------|------------|-------------------------------|------------|-------------------------------|------------|-------------------------------|------------|-------------------------------|------------|
| <i>Afap1</i>    | 0.13                          | 0.55       | 0.08                          | 0.26       | 0.11                          | 0.20       | 0.22                          | 0.17       | 0.33                          | 0.0073     |
| <i>Angpt1</i>   | -0.34                         | 0.48       | -0.01                         | 0.56       | -0.32                         | 0.10       | -0.46                         | 0.12       | 0.30                          | 0.11       |
| <i>Ank</i>      | 0.13                          | 0.55       | 0.15                          | 0.20       | 0.00                          | 0.54       | 0.27                          | 0.14       | 0.34                          | 0.033      |
| <i>Arhgef12</i> | -0.03                         | 0.75       | -0.13                         | 0.08       | -0.18                         | 0.06       | -0.10                         | 0.26       | 0.01                          | 0.48       |
| <i>Cadm2</i>    | -0.29                         | 0.16       | -0.75                         | 0.0022     | -0.45                         | 0.0203     | -0.89                         | 0.0078     | -0.60                         | 0.0074     |
| <i>Cav1</i>     | 0.03                          | 0.77       | 0.15                          | 0.19       | 0.10                          | 0.34       | 0.42                          | 0.023      | 0.33                          | 0.034      |
| <i>Cav2</i>     | 0.14                          | 0.55       | 0.16                          | 0.12       | 0.25                          | 0.07       | 0.27                          | 0.11       | 0.43                          | 0.0085     |
| <i>Cdkn2b</i>   | 0.36                          | 0.38       | 0.79                          | 0.0017     | 1.26                          | 0.0002     | 1.11                          | 0.0018     | 1.72                          | 0.0001     |
| <i>C14orf39</i> | -0.52                         | 0.25       | -0.47                         | 0.06       | -0.40                         | 0.09       | -0.65                         | 0.06       | -0.50                         | 0.08       |
| <i>Exoc2</i>    | 0.03                          | 0.73       | -0.09                         | 0.36       | 0.13                          | 0.24       | -0.07                         | 0.47       | -0.02                         | 0.48       |
| <i>Fmn12</i>    | 0.07                          | 0.65       | 0.14                          | 0.05       | 0.11                          | 0.27       | 0.17                          | 0.19       | 0.21                          | 0.038      |
| <i>Gas7</i>     | -0.08                         | 0.75       | -0.13                         | 0.37       | 0.61                          | 0.0088     | 0.44                          | 0.05       | 0.14                          | 0.31       |
| <i>Gnb1l</i>    | -0.06                         | 0.70       | 0.20                          | 0.12       | 0.05                          | 0.46       | -0.02                         | 0.54       | -0.01                         | 0.48       |
| <i>Lmx1b</i>    | -0.14                         | 0.54       | 0.02                          | 0.52       | -0.11                         | 0.23       | 0.00                          | 0.56       | -0.06                         | 0.38       |
| <i>Noc3l</i>    | 0.12                          | 0.61       | -0.06                         | 0.41       | -0.09                         | 0.37       | 0.17                          | 0.23       | 0.21                          | 0.11       |
| <i>Pde7b</i>    | 0.08                          | 0.71       | 0.41                          | 0.0083     | 0.38                          | 0.0475     | 0.30                          | 0.06       | 0.12                          | 0.28       |
| <i>Plce1</i>    | 0.14                          | 0.50       | 0.36                          | 0.011      | 0.43                          | 0.014      | 0.24                          | 0.17       | 0.48                          | 0.0060     |
| <i>Six6</i>     | -0.19                         | 0.61       | -0.17                         | 0.28       | 0.32                          | 0.06       | -0.11                         | 0.38       | -0.09                         | 0.32       |
| <i>Srsf3</i>    | -0.16                         | 0.35       | -0.37                         | 0.0076     | -0.32                         | 0.0044     | -0.22                         | 0.09       | -0.24                         | 0.06       |
| <i>Stam2</i>    | 0.14                          | 0.55       | 0.20                          | 0.15       | 0.35                          | 0.043      | 0.37                          | 0.07       | 0.39                          | 0.06       |
| <i>Tcf12</i>    | 0.13                          | 0.49       | 0.19                          | 0.08       | 0.27                          | 0.023      | 0.32                          | 0.06       | 0.48                          | 0.0018     |
| <i>Tmco1</i>    | 0.14                          | 0.36       | 0.17                          | 0.07       | 0.16                          | 0.09       | 0.20                          | 0.09       | 0.34                          | 0.0045     |
| <i>Tmem136</i>  | -0.24                         | 0.45       | -0.45                         | 0.0049     | -0.17                         | 0.24       | -0.32                         | 0.10       | -0.14                         | 0.24       |
| <i>Tmtc2</i>    | -0.22                         | 0.62       | -0.53                         | 0.10       | -0.88                         | 0.0032     | -0.70                         | 0.025      | -0.52                         | 0.048      |
| <i>Txnrd2</i>   | -0.31                         | 0.16       | -0.21                         | 0.19       | -0.24                         | 0.051      | -0.33                         | 0.0065     | -0.67                         | 0.0044     |

Data is from a previously published microarray gene expression dataset in optic nerve head punches<sup>17,18</sup>. Log<sub>2</sub> fold change (FC) is comparing DBA/2J mice relative to DBA/2J-*Gpnmb*<sup>+</sup> controls at 5 molecularly distinct stages of glaucoma defined using hierarchical clustering. Stages 1, 2 and 3 are early states of glaucoma that precede morphologically detectable glaucoma. Stages 4 and 5 have eyes with moderate and severe optic nerve damage respectively. Q-value (QV) shows the significance of the FC of GWAS genes at each stage as analyzed using MAANOVA.

Significant QV are highlighted in red. All the mice utilized for expression analysis were females. Replicates used for each group are as follows: D2-*Gpmb*<sup>+</sup> Control = 10, D2 stage 1 = 8, stage 2 = 8, stage 3 = 6, stage 4 = 4 and stage 5= 4.

**Supplementary Table 12.** List of qPCR primers for *FMNL2* functional characterization

| <b>Gene</b>                       | <b>Forward Primer</b>       | <b>Reverse Primer</b>       |
|-----------------------------------|-----------------------------|-----------------------------|
| <b><i>House Keeping Genes</i></b> |                             |                             |
| <i>ACTB</i>                       | 5' CCCTGAGGAGCACCCCTGTGC 3' | 5' GGCTGGGGTGTGAAGGTCT 3'   |
| <i>MAPK1</i>                      | 5' TTGAACAGGCTCTGGCCCAC 3'  | 5' TGAATGGCGCTTCAGCAATGG 3' |
| <b><i>Genes of Interest</i></b>   |                             |                             |
| <i>FMNL2</i>                      | 5' AACTCAGGATTAGCAGCTGTG 3' | 5' ATCTGATTGGGCTTCAGGGC 3'  |
| <i>FMNL3</i>                      | 5' GACGTGCTGGTGGATTACCT 3'  | 5' CCGGAGCTTGTCAAATGCAC 3'  |



## REFERENCES

- 1 Williams, P. A. *et al.* Vitamin B3 modulates mitochondrial vulnerability and prevents glaucoma in aged mice. *Science* **355**, 756-760, doi:10.1126/science.aal0092 (2017).
- 2 Banda, Y. *et al.* Characterizing Race/Ethnicity and Genetic Ancestry for 100,000 Subjects in the Genetic Epidemiology Research on Adult Health and Aging (GERA) Cohort. *Genetics* **200**, 1285-1295, doi:10.1534/genetics.115.178616 (2015).
- 3 Bailey, J. N. *et al.* Genome-wide association analysis identifies TXNRD2, ATXN2 and FOXC1 as susceptibility loci for primary open-angle glaucoma. *Nat Genet* **48**, 189-194, doi:10.1038/ng.3482 (2016).
- 4 Wiggs, J. L. *et al.* Common variants at 9p21 and 8q22 are associated with increased susceptibility to optic nerve degeneration in glaucoma. *PLoS Genet* **8**, e1002654, doi:10.1371/journal.pgen.1002654 (2012).
- 5 Li, Z. *et al.* A common variant near TGFBR3 is associated with primary open angle glaucoma. *Hum Mol Genet* **24**, 3880-3892, doi:10.1093/hmg/ddv128 (2015).
- 6 Burdon, K. P. *et al.* Genome-wide association study identifies susceptibility loci for open angle glaucoma at TMC01 and CDKN2B-AS1. *Nat Genet* **43**, 574-578, doi:10.1038/ng.824 (2011).
- 7 Osman, W., Low, S. K., Takahashi, A., Kubo, M. & Nakamura, Y. A genome-wide association study in the Japanese population confirms 9p21 and 14q23 as susceptibility loci for primary open angle glaucoma. *Hum Mol Genet* **21**, 2836-2842, doi:10.1093/hmg/dds103 (2012).
- 8 Gharahkhani, P. *et al.* Common variants near ABCA1, AFAP1 and GMDS confer risk of primary open-angle glaucoma. *Nat Genet* **46**, 1120-1125, doi:10.1038/ng.3079 (2014).
- 9 Springelkamp, H. *et al.* New insights into the genetics of primary open-angle glaucoma based on meta-analyses of intraocular pressure and optic disc characteristics. *Hum Mol Genet* **26**, 438-453, doi:10.1093/hmg/ddw399 (2017).
- 10 Thorleifsson, G. *et al.* Common variants near CAV1 and CAV2 are associated with primary open-angle glaucoma. *Nat Genet* **42**, 906-909, doi:10.1038/ng.661 (2010).
- 11 Hoffmann, T. J. *et al.* Genome-wide association and admixture analysis of glaucoma in the Women's Health Initiative. *Hum Mol Genet* **23**, 6634-6643, doi:10.1093/hmg/ddu364 (2014).
- 12 Springelkamp, H. *et al.* ARHGEF12 influences the risk of glaucoma by increasing intraocular pressure. *Hum Mol Genet* **24**, 2689-2699, doi:10.1093/hmg/ddv027 (2015).
- 13 Chen, Y. *et al.* Common variants near ABCA1 and in PMM2 are associated with primary open-angle glaucoma. *Nat Genet* **46**, 1115-1119, doi:10.1038/ng.3078 (2014).
- 14 Wagner, A. H. *et al.* Exon-level expression profiling of ocular tissues. *Exp Eye Res* **111**, 105-111, doi:10.1016/j.exer.2013.03.004 (2013).
- 15 Bowes Rickman, C. *et al.* Defining the human macula transcriptome and candidate retinal disease genes using EyeSAGE. *Invest Ophthalmol Vis Sci* **47**, 2305-2316, doi:10.1167/iovs.05-1437 (2006).
- 16 Liu, Y. *et al.* Serial analysis of gene expression (SAGE) in normal human trabecular meshwork. *Mol Vis* **17**, 885-893 (2011).

- 17 Howell, G. R. *et al.* Molecular clustering identifies complement and endothelin induction as early events in a mouse model of glaucoma. *J Clin Invest* **121**, 1429-1444, doi:10.1172/JCI44646 (2011).
- 18 Howell, G. R., Walton, D. O., King, B. L., Libby, R. T. & John, S. W. Datgan, a reusable software system for facile interrogation and visualization of complex transcription profiling data. *BMC Genomics* **12**, 429, doi:10.1186/1471-2164-12-429 (2011).
